## Isoform-specific characterization implicates alternative splicing in *APOBEC3B* as a mechanism restricting APOBEC-mediated mutagenesis

A. Rouf Banday<sup>1</sup>, Olusegun O. Onabajo<sup>1</sup>, Seraph Han-Yin Lin<sup>1</sup>, Adeola Obajemu<sup>1</sup>, Joselin M. Vargas<sup>1</sup>, Krista A. Delviks-Frankenberry<sup>2</sup>, Philippe Lamy<sup>3</sup>, Ariunaa Bayanjargal<sup>1</sup>, Clara Zettelmeyer<sup>1</sup>, Oscar Florez-Vargas<sup>1</sup>, Vinay K. Pathak<sup>2</sup>, Lars Dyrskjøt<sup>3</sup>, Ludmila Prokunina-Olsson<sup>1\*</sup>

<sup>1</sup>Laboratory of Translational Genomics, Division of Cancer Epidemiology and Genetics, National Cancer Institute, National Institutes of Health, Bethesda, MD, USA

<sup>2</sup> Viral Mutation Section, HIV Dynamics and Replication Program, Center for Cancer Research, National Cancer Institute, Frederick, MD, USA

<sup>3</sup>Department of Molecular Medicine, Aarhus University Hospital, Aarhus, Denmark

- 1 \* To whom correspondence should be addressed:
- 2 Ludmila Prokunina-Olsson, PhD
- 3 Laboratory of Translational Genomics,
- 4 Division of Cancer Epidemiology and Genetics,
- 5 National Cancer Institute,
- 6 9615 Medical Center Dr,
- 7 Bethesda, MD 20892-9776
- 8 Tel:+1 240-760-6531; Fax: +1 240-541-4442
- 9 E-mail: [prokuninal@mail.nih.gov](mailto:prokuninal@mail.nih.gov)

**Running title:** Regulation of APOBEC3 mutagenesis by alternative splicing

**Key words:** APOBEC-mediated mutagenesis; APOBEC3B; alternative splicing; pladienolide B; cancer; bladder cancer.

10 **ABSTRACT**

11 APOBEC3A (A3A) and APOBEC3B (A3B) enzymes drive APOBEC-mediated mutagenesis, but the  
12 understanding of the regulation of their mutagenic activity remains limited. Here, we showed that  
13 mutagenic and non-mutagenic A3A and A3B enzymes are produced by canonical and alternatively  
14 spliced *A3A* and *A3B* isoforms, respectively. Notably, increased expression of the canonical *A3B*  
15 isoform, which encodes the mutagenic A3B enzyme, predicted shorter progression-free survival of  
16 bladder cancer patients. Expression of the mutagenic *A3B* isoform was reduced by exon 5 skipping,  
17 generating a non-mutagenic *A3B* isoform. The exon 5 skipping, which was dependent on the  
18 interaction between SF3B1 splicing factor and weak branch point sites in intron 4, could be enhanced  
19 by an SF3B1 inhibitor, decreasing the production of the mutagenic A3B enzyme. Thus, our results  
20 underscore the role of A3B, especially in bladder cancer, and implicate alternative splicing of *A3B* as  
21 a mechanism and therapeutic target to restrict APOBEC-mediated mutagenesis.

22

23

24

25

26

27

28

## 29 INTRODUCTION

30 Enrichment of C-to-T or C-to-G mutations within the TCA and TCT motifs, attributed to APOBEC-  
31 mediated mutagenesis, has been implicated in cancer susceptibility<sup>1</sup>, tumor evolution<sup>2,3</sup>, metastatic  
32 progression<sup>4,5</sup>, treatment response<sup>3,6</sup>, and survival<sup>1</sup>. Thus, understanding and harnessing the  
33 mechanisms regulating this mutational process is of clinical importance. Among the seven members  
34 of the APOBEC3 enzyme family, A3A<sup>7,8</sup>, A3B<sup>9</sup>, and an allelic variant of APOBEC3H (A3H)<sup>10</sup> have  
35 been linked with APOBEC mutagenesis in tumors.

36 The intrinsic and extrinsic factors that regulate the expression levels of *APOBEC3s* might explain  
37 some of the differences in the load of APOBEC-signature mutations within and between tumors of  
38 different types. These intrinsic factors include common germline variants - a single nucleotide  
39 polymorphism (SNP) rs1014971 and the *A3AB* deletion<sup>1,11</sup>, or their correlated proxies, SNPs  
40 rs17000526 and rs12628403<sup>1</sup>. The same genetic variants have also been associated with *A3B*  
41 expression, such as rs1014971 regulating *A3B* expression through an allele-specific effect on an  
42 enhancer upstream of the *APOBEC3* gene cluster<sup>1</sup>, and the *A3AB* deletion – through the elimination  
43 of one or both copies of the *A3B* gene<sup>11,12</sup>. A haplotype represented by a missense SNP rs139297  
44 (Gly105Arg) that creates an A3H protein isoform with nuclear localization (A3H-I), has been  
45 associated with APOBEC-signature mutations in *A3A* and *A3B*-null breast and lung tumors<sup>10</sup>.  
46 Extrinsic factors that induce expression of specific *APOBEC3s* include viral infections<sup>1,13</sup> and  
47 exposure to environmental or chemotherapeutic DNA-damaging agents<sup>1,2,14</sup>. Most of the conclusions  
48 about the role of A3A and A3B in mutagenesis were drawn from studies based onRNA-seq, despite  
49 poor ability to resolve and confidently quantify mRNA expression of these highly homologous  
50 APOBECs by short sequencing reads<sup>10</sup>.

51 Alternative splicing (AS) of pre-mRNA can produce functionally distinct isoforms or regulate gene  
52 expression through downstream mechanisms, such as nonsense-mediated decay (NMD)<sup>15</sup>.  
53 Alternatively spliced isoforms of other *APOBEC3* genes (*APOBEC3H* and *APOBEC3F*) have been  
54 reported to generate enzymes with variable activity<sup>16-18</sup>, but the effects of AS in *A3A* and *A3B* on  
55 functional activities of these enzymes and relevant clinical outcomes have not been explored. Here,  
56 we characterized AS in *A3A* and *A3B* in relation to APOBEC-mediated mutagenesis and explored the  
57 mechanisms of its regulation and possible therapeutic modulation.

## 58 **RESULTS**

### 59 **Expression profiling based on specific exon-exon junctions provides more accurate** 60 **quantification of *A3A* and *A3B* transcripts compared to total gene expression analysis by RNA-** 61 **seq**

62 According to the human reference genome annotation (hg19, UCSC), *A3A* and *A3B* genes have 2 and  
63 3 alternative isoforms, respectively (**Table S1, Figure S1A**). Among these, only canonical isoforms,  
64 which we designated as *A3A1* and *A3B1*, but not alternatively spliced isoforms (*A3A2*, *A3B2*, and  
65 *A3B3*), have been studied. First, we confirmed the existence of all these isoforms by analyzing RNA-  
66 seq reads in TCGA dataset and identifying exon-exon junction reads specific to each of these  
67 isoforms (**Figure 1A, Figure S1B**). The alternative *A3A* and *A3B* isoforms were expressed in 3.49%  
68 and >50% samples, respectively (**Figure 1B, C**). Notably, we found quantification based on specific  
69 exon-exon junctions (by RNA-seq or qRT-PCR) more reliable than based on total gene expression by  
70 RNA-seq (**Note S1**).

71 This was also reflected by the analysis of *A3A* and *A3B* expression in TCGA samples comparing  
72 detection based on all gene-specific reads vs. exon-exon junction reads for specific isoforms. Based

73 on total RNA-seq reads, *A3A* was undetectable only in 0.16% (18 of 11,058) of TCGA samples  
74 (**Figure 1B**). However, based on junction reads for the canonical isoform *A3A1* (E1-E2 junction),  
75 expression was undetectable in 36.9% (4079 of 11,058) of TCGA samples (**Figure 1B**). Similarly,  
76 *A3B* expression was undetectable by total RNA-seq reads only in 0.07% (8 of 11,058) of TCGA  
77 samples, but this number was 4.2% (468 of 11,058) based on junction reads for the canonical *A3B1*  
78 isoform (E5-E6 junction reads, **Figure 1C**). Thus, due to high homology between *A3A* and *A3B*  
79 (**Note S1**), the misaligned RNA-seq reads would incorrectly represent the expression of both genes,  
80 affecting downstream analyses and biological interpretation.

### 81 **Alternative protein isoforms of *A3A* and *A3B* are non-mutagenic**

82 To better understand the functional properties of these alternative isoforms, we performed  
83 computational analysis of their protein sequences. Compared to *A3A1*, *A3A2* lacks 18 aa (residues  
84 10-28) due to AS between exons 1 and 2, including residues His11 and His16, which are important  
85 for deamination activity<sup>19</sup> (**Figure 2A**). *A3B2* is produced due to AS in exon 6, resulting in the loss  
86 of 25 aa (residues 242-266, **Figure 2B**), including His253 that stabilizes the zinc cofactor, and  
87 Glu255 that directly participates in a nucleophilic attack on cytosine during deamination<sup>20</sup>.

88 The *A3B3* isoform is generated by skipping of exon 5 in *A3B* and encodes truncated and likely  
89 unstable protein without the catalytic domain, in which a 132 aa fragment in the C-terminus of *A3B*  
90 is replaced by 62 aa of an aberrant frameshifted sequence (**Figure 2B**). The stop codon in the  
91 penultimate exon also makes the *A3B3* transcript a potential target for NMD. Indeed, expression of  
92 *A3B3* mRNA was significantly increased after the treatment of HT-1376 cells with digoxin, a known  
93 NMD inhibitor<sup>21</sup> (**Figure 2C**). Due to NMD, only residual levels of *A3B3* may be detected by  
94 expression studies, including by RNA-seq, likely resulting in an underestimation of its expression.

95 Evaluation of the deaminating (mutagenic) potential of recombinant APOBEC3 proteins (**Figure 2D**)  
96 showed activities for the canonical A3A1 and A3B1 isoforms, but not for the alternative A3A2,  
97 A3B2 and A3B3 proteins (**Figure 2E, F**). The alternative protein isoforms did not show dominant-  
98 negative effects on the activities of A3A1 and A3B1 evaluated either by deamination assays (**Figure**  
99 **S2**) or by HIV-1 infectivity inhibition assays<sup>22-24</sup> (**Figure 2G, Figure S3**). Based on these results, we  
100 concluded that AS of *A3A* and *A3B* results in the production of catalytically inactive, non-mutagenic  
101 protein isoforms of these enzymes.

### 102 **Isoform-specific analysis refines the correlations between *A3A* and *A3B* expression and** 103 **APOBEC-mediated mutagenesis**

104 Previously, multiple reports showed significant correlations between total expression of *A3A* and *A3B*  
105 genes and the burden of APOBEC-signature mutations in several tumor types<sup>8,25</sup>. Now, we revisited  
106 these conclusions based on correlations between the expression of the mutagenic *A3A1* and *A3B1*  
107 isoforms quantified by RNA-seq read counts for specific exon-exon junctions and ‘APOBEC  
108 mutation pattern’ proposed as the most stringent estimate of APOBEC-signature mutation burden<sup>7</sup>.  
109 The analysis was performed in six cancer types with  $\geq 10\%$  tumors carrying these mutations (**Figure**  
110 **S4**).

111 We observed significant positive correlations between the expression of both mutagenic isoforms -  
112 *A3A1* and *A3B1* and APOBEC mutation burden in multiple cancers. For *A3A1*, we observed  
113 correlations in BRCA ( $P = 5.49E-08$ ;  $\rho = 0.17$ ), CESC ( $P = 7.84E-08$ ;  $\rho = 0.37$ ) and HNSC ( $P =$   
114  $3.684E-08$ ;  $\rho = 0.24$ ), while for *A3B1* - in BLCA ( $P = 2.76E-07$ ;  $\rho = 0.25$ ). In LUAD, the  
115 correlations were comparable for both *A3A1* ( $P = 3.12E-12$ ;  $\rho = 0.31$ ) and *A3B1* ( $P = 7.73E-12$ ;  $\rho$   
116  $= 0.30$ ) and in LUSC – it was moderately significant only for *A3A1* ( $P = 1.86E-02$ ;  $\rho = 0.17$ )

117 **(Figure 3A, B)**. Notably, these tumor-specific correlations were not reported by studies based on total  
118 gene expression<sup>8,25</sup>. Our results also corroborate previous findings based on germline variants, which  
119 implicated A3A as a more prominent mutagen in BRCA and A3B – in BLCA<sup>1,11</sup>.

### 120 **APOBEC mutagenesis in bladder tumors: A3B as a driver and a predictor of progression-free** 121 **survival**

122 It was reported that cell lines exhibit episodes of APOBEC-mediated mutagenesis during propagation  
123 in culture<sup>26</sup>. The studied cell lines included bladder cancer cell lines, in which we detected the  
124 expression of *A3B1* but not *A3A1* (**Note S1**), thus nominating A3B1 rather than A3A1 as the primary  
125 mutagenic APOBEC3 enzyme responsible for these episodes of mutagenic activity. Our analysis of  
126 non-muscle invasive bladder tumors from the UROMOL study<sup>27</sup> further supported the role of A3B1  
127 in bladder cancer. Specifically, using the same RNA-seq exon junction isoform-specific  
128 quantification of expression as in TCGA samples, we observed that higher expression of *A3B1* was  
129 significantly associated with increased APOBEC-mediated mutation burden ( $P = 5.51E-06$ ) and with  
130 shorter progression-free survival ( $P = 5.69E-05$ ) in patients with non-muscle-invasive bladder cancer  
131 (**Figure 3C, D**). Similar quantification of the *A3A1* expression in the UROMOL tumors showed no  
132 association with APOBEC-mediated mutagenesis or progression-free survival.

### 133 **The ratio of the non-mutagenic isoform A3B3 is higher in normal tissues compared to tumors**

134 Alternative *A3B* isoforms (*A3B2* and *A3B3*) are detected in  $\geq 50\%$  of 11,058 TCGA samples (**Figure**  
135 **1**). Although these isoforms may not produce any functional proteins (**Figure 1**), they still could be  
136 important. For example, splicing towards alternative, non-mutagenic isoforms might decrease the  
137 production of the canonical, mutagenic isoforms. Because mutagenesis is considered tumorigenic, we  
138 hypothesized that the proportion of splicing towards non-mutagenic isoforms might be higher in

139 normal tissues compared to tumors. To test this hypothesis, we calculated the percent spliced-in index  
140 (PSI)<sup>28</sup> based on RNA-seq read counts of specific exon junctions in TCGA paired tumor and normal  
141 tissues. *A3A* was excluded from this analysis because the expression of the alternative *A3A2* isoform  
142 was detected only in 2.57% (18 of 698) of normal samples (**Figure S5A**). Thus, we calculated PSI for  
143 exons 5 and 6 of *A3B* in 17 TCGA cancer types with  $\geq 5$  tumor/normal pairs. We observed that the  
144 proportion of *A3B* alternative splicing was significantly lower in tumors compared to paired normal  
145 tissues. Specifically, the proportion of *A3B2* splicing was lower in tumors of KICH ( $P = 1.0E-03$ ) and  
146 LUSC ( $P = 3.30E-02$ ) (**Figure 4A, left plot**) and the proportion of *A3B3* splicing was lower in  
147 tumors of BLCA ( $P = 4.60E-03$ ), HNSC ( $P = 6.50E-03$ ), LICH ( $P = 1.90E-02$ ), LUAD ( $P = 1.50E-$   
148  $03$ ), and LUSC ( $P = 3.89E-05$ ) (**Figure 4A, right plot**). All other cancer types showed no significant  
149 differences in this analysis (**Figure S5B, C**). Most cancer types with a low proportion of non-  
150 mutagenic isoforms, specifically of *A3B3*, also had a higher rate of APOBEC-mediated mutation  
151 burden<sup>7,8</sup>, with exceptions for tumors of KICH and LICH, in which APOBEC-signature mutations  
152 were negligible (**Figure S4**). In these cancers, *A3B* might play a mitogenic rather than a mutagenic  
153 role as has been shown for hepatocellular carcinoma<sup>29</sup> and suggested for breast cancer<sup>30</sup>.

154 We also performed qRT-PCR analysis and sequencing of splicing junctions between exons 4 and 6 of  
155 *A3B* in a panel of 33 muscle-invasive bladder tumors and 30 adjacent normal tissues (**Figure 4B**).  
156 Exon 5 skipping, generating *A3B3*, was the most frequently observed AS event, similar to the pattern  
157 observed in TCGA, and more common in normal tissues compared to tumors (**Figure 4B**). Western  
158 blot analysis in the same tissue samples showed that *A3B1* protein expression was common in tumors  
159 but rare in normal tissues, although the frameshifted and truncated *A3B3* protein could not be  
160 detected (**Figure 4C, Note S2**). We then used isoform-specific TaqMan assays to quantify the  
161 expression of *A3B* isoforms in the same set of bladder tissues. The expression of *A3B1* was



162 significantly higher in tumors, while *A3B3* was higher in normal tissues, and *A3B2* was not  
163 quantifiable (**Figure 4D**). The fact that AS of *A3B* was more common in normal tissues suggests that  
164 increased generation of alternative, non-mutagenic *A3B* isoforms might be anti-tumorigenic and  
165 inhibited in tumors.

#### 166 ***A3B* exon 5 skipping is sensitive to expression levels of some splicing factors**

167 Considering that *A3B1* is clinically relevant, at least in bladder tumors (**Figure 3C,D**), decreasing its  
168 expression might be of therapeutic importance. We hypothesized this could be achieved by shifting  
169 *A3B* pre-mRNA splicing from the mutagenic *A3B1* to non-mutagenic *A3B2* or *A3B3* isoforms. To this  
170 end, we first sought to explore the regulation of these splicing events. AS outcomes are regulated by  
171 the interaction of *trans*-acting spliceosomal and splicing factors (SFs) with *cis*-acting intronic and  
172 exonic pre-mRNA motifs<sup>31</sup>. To explore AS of *A3B*, we created mini-genes by cloning the  
173 corresponding alternative exons with 80 bp of flanking intronic sequences into an Exontrap vector  
174 (**Figure S6A**). These mini-genes were transiently transfected into HEK293T cells, and their splicing  
175 patterns were evaluated. This experimental system was not informative for evaluation of splicing  
176 occurring via a cryptic splicing site in exon 6 of *A3B*, as the observed splicing pattern represented  
177 only the canonical (*A3B1*) but not the alternative (*A3B2*) isoform (**Figure S6B**). However, we could  
178 capture an AS pattern of *A3B* exon 5, with its inclusion representing a proxy of the *A3B1* isoform and  
179 its skipping representing a proxy of the *A3B3* isoform. We used this mini-gene construct for exon 5  
180 (E5) to further explore the regulation of *A3B1* versus *A3B3* splicing patterns.

181 We hypothesized that splicing of *A3B* exon 5 might be affected by SFs that bind within this exon and  
182 bioinformatically predicted several candidate SFs (**Table S3**). To experimentally test these  
183 predictions, we co-transfected HEK293T cells with expression constructs for 10 of these SFs (**Table**

184 **S4)** together with the E5 mini-gene; four SFs – SRSF2, SRSF3, CELF1-T4, and ELAVL2 -  
185 significantly affected exon 5 splicing (**Figure 5A**), with SRSF2 showing the strongest effect. The  
186 effect of SRSF2 on exon 5 splicing was further confirmed in three additional bladder cancer cell lines  
187 - HT-1376, SW780, and HTB-9 (**Figure S7**). Screening of exon 5 splicing in 10 cell lines of different  
188 tissue origin also showed variable exon 5 skipping (**Figure 5B**), presumably due to differences in  
189 levels of expression/activity of endogenous SFs in these cell lines. These results suggested sensitivity  
190 of *A3B* exon 5 skipping to expression levels of some SFs, such as SRSF2, which can bind to cis-  
191 regulatory motifs<sup>31-34</sup> within this exon or its flanking introns.

#### 192 **Skipping of *A3B* exon 5 is facilitated by weak intronic branch point sites within intron 4**

193 Bioinformatics analysis of *A3B* showed differences in the distribution of predicted cis-regulatory  
194 motifs - intronic branch point sites (BPS) (**Figure 5C, Table S5**) and exonic splicing  
195 silencers/enhancers (**Figure 5D**). The most striking differences were found within intron 4 that  
196 harbored the fewest and the weakest scored BPS of all introns in *A3B*. The highest scored intronic  
197 BPS located 38 bp and 50 bp upstream of exon 5 were included in the 80 bp of flanking intronic  
198 sequences in the E5 mini-gene (referred as E5<sup>BPS+</sup>) and supported the observed partial inclusion of  
199 exon 5 that generates the *A3BI*-type canonical splicing event (**Figure 5E**). We then created an E5  
200 mini-gene version with only 20 bp of flanking intronic sequences to exclude the putative BPS and  
201 observed no canonical *A3BI*-type splicing in this model (E5<sup>BPS-</sup>, **Figure 5E**), confirming the  
202 importance of the putative BPS in intron 4 for exon 5 inclusion/skipping. In agreement with the  
203 stronger predicted BPS in intron 5 compared to those in intron 4, only canonical splicing with  
204 complete inclusion of exon 6 was observed in a corresponding mini-gene for exon 6 of *A3B* with 80  
205 bp of flanking intronic sequences (E6<sup>BPS+</sup>). Consistently, no canonical splicing was observed in the  
206 E6<sup>BPS-</sup> mini-gene, which lacks the intron 5 BPS (**Figure 5E**).

207 Based on these results, we concluded that skipping of *A3B* exon 5 is facilitated by weak BPS in intron  
208 4. The magnitude of exon 5 skipping is likely to be determined by expression levels of some SFs that  
209 might differ between tissue types and disease conditions, including normal tissues vs. tumors.

## 210 **SF3B1 inhibitor pladienolide B promotes skipping of *A3B* exon 5 and reduces *A3B1* production**

211 Efficient canonical splicing requires robust interaction of the spliceosomal machinery with intronic  
212 BPS; thus, exon 5 skipping could represent a weak engagement of the spliceosome to BPS in intron 4  
213 (**Figure 6A**). Spliceosomal interaction with BPS is facilitated by the SF3b complex, with SF3B1 as a  
214 core protein<sup>35</sup>. We hypothesized that an inhibitor of SF3B1, such as pladienolide B<sup>35,36</sup>, would  
215 destabilize interaction of SF3b complex at weak BPS within intron 4, resulting in enhanced exon 5  
216 skipping, but may not significantly affect exon 6 splicing that is regulated by strong BPS in intron 5  
217 (**Figure 6B**). We tested this hypothesis by evaluating splicing patterns of E5<sup>BPS+</sup> and E6<sup>BPS+</sup> mini-  
218 genes in cells treated with pladienolide B. This treatment not only enhanced but caused complete  
219 exon 5 skipping in a concentration-dependent manner while not affecting exon 6 splicing (**Figure**  
220 **6C**). Skipping of endogenous exon 5 of *A3B* was also increased by this treatment, resulting in higher  
221 expression of *A3B3* mRNA and reduced expression of *A3B1* mRNA and A3B1 protein (**Figure 6D,**  
222 **E, Figure S8A**). Importantly, the reduction of A3B1 protein caused by pladienolide B treatment was  
223 more prominent than the induction of *A3B3* expression, although it might be difficult to detect due to  
224 degradation of *A3B3* transcript by NMD (**Figure 1C**). This hypothesis was supported by a much  
225 stronger induction of *A3B3* expression by pladienolide B in the presence of digoxin, an NMD  
226 blocker<sup>21</sup> (**Figure 6F**). These experiments confirmed that exon 5 skipping is facilitated by weak BPS  
227 in intron 4 but is dependent on the availability of active SFs, such as SF3B1. The role of SF3B1 in  
228 this process was further confirmed by its siRNA-mediated knockdown in HT-1376 cells, resulting in

229 increased skipping of *A3B* exon 5 (**Figure S8B**). Thus, sequestering of active SF3B1 by any of its  
230 inhibitors should increase *A3B* exon 5 skipping, leading to reduced levels of mutagenic A3B1.  
231 Reducing the levels of mutagenic A3B1 enzyme might restrict APOBEC mutagenesis in some  
232 clinically relevant conditions. To test this, we simultaneously treated cells with bleomycin, a  
233 chemotherapy drug, which induces *A3B* expression<sup>1</sup>, and pladienolide B. Deaminating (mutagenic)  
234 activity observed in lysates of these cells due to the presence of endogenous bleomycin-induced A3B  
235 was completely blocked by pladienolide B (**Figure 6G**). We also showed that pladienolide B  
236 inhibited APOBEC-mediated mutagenic activity in a cell-based cytosine deamination assay (**Figure**  
237 **S9**).

## 238 **DISCUSSION**

239 High activity of the A3A and A3B enzymes is mutagenic and genotoxic, as suggested by *in vitro*  
240 overexpression studies<sup>38-41</sup> and significant positive correlations between mRNA expression of genes  
241 encoding these enzymes and burden of APOBEC-signature mutations in tumors<sup>1,8,25,42</sup>. Multiple  
242 mechanisms likely exist to regulate the activity of these enzymes and restrict cell damage they may  
243 cause. Here, we showed that AS of *APOBEC3s*, particularly of *A3B*, is one of several possible  
244 regulatory mechanisms controlling the expression of the mutagenic A3B1 enzyme. We present proof-  
245 of-principle data suggesting that AS can be modulated to shift the A3B balance from producing  
246 mutagenic to non-mutagenic isoforms.

247 Initially, we explored the functional consequences of splicing events within exon 2 in *A3A* and exon 6  
248 in *A3B*, both occurring via cryptic splicing sites, and skipping of the entire exon 5 in *A3B*. In all these  
249 cases, AS resulted in a shift from the production of the canonical isoforms (*A3A1* and *A3B1*) that  
250 encode mutagenic enzymes, to corresponding alternative isoforms (*A3A1*, *A3B2*, and *A3B3*) that

251 encode non-mutagenic enzymes. The expression of the canonical isoforms positively correlated with  
252 a load of APOBEC-signature mutations in TCGA tumors of different types. The isoform-level  
253 analysis also suggested that *A3A1* and *A3B1* might contribute to APOBEC mutagenesis in a cancer-  
254 type specific manner. Our previous finding that a common genetic variant identified by a GWAS for  
255 bladder cancer risk was also associated with *A3B* expression and APOBEC mutagenesis<sup>1</sup>, nominated  
256 *A3B* as the primary mutagenic APOBEC in bladder tumors. This was further supported by the  
257 association of increased *A3B1* expression with higher APOBEC mutation score and shorter  
258 progression-free survival in patients with non-muscle invasive bladder cancer.

259 AS is regulated by a complex interplay between the core spliceosomal and alternative SFs<sup>31</sup> that bind  
260 cis-acting exonic and intronic elements. These interactions can depend on various tissue- and disease-  
261 specific environments<sup>43</sup>. Analysis of splicing patterns using our *in vitro* mini-gene Exontrap system  
262 identified splicing plasticity of *A3B* exon 5, which we attributed to the weak BPS in intron 4 of this  
263 gene and levels of SF3B1. Splicing of endogenous exon 5 also varied in cell lines of different tissue  
264 origin and was sensitive to changes in expression levels of some other SFs predicted to bind within  
265 this exon, such as SRSF2.

266 We observed that *A3B* splicing events were more common in adjacent normal tissues compared to  
267 tumors of several types. This suggests that AS of *A3B* is an intrinsic, tissue-specific regulatory  
268 mechanism rather than a result of general dysregulation of splicing machinery in tumors<sup>44,45</sup>,  
269 manifested in the inactivation of tumor suppressor genes and generation of tumor-specific isoforms<sup>46</sup>.  
270 On the other hand, mutations in splicing or other regulatory factors that would affect splicing  
271 globally, could also result in decreased expression of alternative *A3B2* and *A3B3* isoforms and,  
272 consequently, lead to increased APOBEC mutagenesis. Thus, AS of *A3B* might be a natural

273 mechanism restricting the expression of mutagenic isoforms in some conditions such as in normal  
274 tissues.

275 The observed splicing plasticity of *A3B* mRNA might represent an adaptive biological mechanism of  
276 tuning down the excessive effects of mutagenic APOBEC3 proteins to safeguard the cells from the  
277 genotoxic activity of these enzymes. A similar role has been proposed for several SFs, including  
278 SRSF2, which affected *A3B* exon 5 splicing in our experiments. These SFs regulate the expression of  
279 DNA repair proteins to protect the genome from DNA damage and the toxic effects of mutagens<sup>47-50</sup>.  
280 Splicing re-routing, such as by exclusion of exon 5 in *A3B*, followed by elimination of the alternative  
281 frame-shifted *A3B3* transcript by NMD might be a mechanism to tweak APOBEC mutagenesis in  
282 specific conditions. The entire functional role of *A3B3* could be just to use up some pre-mRNA that  
283 otherwise would be used to produce the mutagenic A3B1 enzyme, and then get degraded by NMD.  
284 Thus, the NMD-targeted *A3B3* transcript not producing a functional protein might still play an  
285 important role in the regulation of APOBEC mutagenesis, regardless of its low residual expression  
286 levels observed in TCGA tumors.

287 A recent study has analyzed mutational signatures in a large set of cell lines and suggested that the  
288 initiators of APOBEC mutagenesis *in vitro* are cell-intrinsic factors with continuous but intermittent  
289 activity<sup>26</sup>. As the authors did not observe significant correlations between APOBEC mutagenesis and  
290 expression of *APOBEC3* genes, they suggested that these initiators may include modulators such as  
291 the availability of single-stranded DNA (ssDNA) substrate, etc. Based on our observations that *A3BI*  
292 and not *A3AI* is expressed in bladder cancer cell lines, which have a high load of APOBEC-signature  
293 mutations, it is likely that at least in these cell lines episodic APOBEC-mediated mutagenesis is  
294 caused by the A3B1 activity.

295 Therapeutic targeting of AS to treat cancer is a rapidly developing field<sup>51</sup> with several types of SF3B1  
296 inhibitors, such as E7107<sup>52,53</sup>, an analog of pladienolide B, and H3B-8800<sup>54</sup> being evaluated for acute  
297 myeloid leukemia (AML) and myelodysplastic syndrome (MDS)<sup>36,51,54</sup>. Because tumor cells depend  
298 on wild-type SFs for survival, these drugs are particularly effective in killing cancer cells with  
299 already impaired splicing machinery due to mutations in SFs, such as SRSF2 and SF3B1<sup>54</sup>. Mutations  
300 in these and other SFs have been reported in many solid tumors, including bladder cancer<sup>55</sup> and these  
301 tumors tend to have more APOBEC-signature mutations (**Figure S10**). Our results suggest that  
302 SF3B1 inhibitors and other tools affecting alternative splicing, might be tested to eliminate cancer  
303 cells with mutations in SF and also to control APOBEC mutagenesis in clinically relevant conditions.  
304 It is interesting to note that *FGFR3-S249C*, the most common somatic mutation found in the highly  
305 recurrent non-muscle invasive bladder cancer, is likely caused by APOBEC mutagenic activity<sup>56</sup>. As  
306 we found A3B1 the primary mutagenic APOBEC enzyme in bladder tumors, enhancing *A3B* exon 5  
307 skipping might help to restrict APOBEC-mediated mutagenesis, including *FGFR3-S249C* mutation  
308 in bladder cancer, as well as prevent tumor progression and recurrence, clonal evolution, and  
309 resistance to chemotherapy (**Figure 7**).

310 In conclusion, our study showed that AS of *A3B*, which creates non-mutagenic isoforms, represents  
311 an intrinsic regulatory mechanism that keeps in check the expression of the mutagenic A3B1 enzyme,  
312 modulates APOBEC-mediated mutagenesis in different disease-, tissue- and environment-specific  
313 conditions, and can be therapeutically targeted. Additional functional studies will be needed to better  
314 understand the consequences of this modulation for clinical outcomes.

315

316

## 317 MATERIALS AND METHODS

### 318 Analysis in TCGA samples

#### 319 *Data acquisition and processing*

320 The mutation dataset for all TCGA cancer types was downloaded from the Broad GDAC Firehose in  
321 October 2016. For analysis of APOBEC-signature mutations, we used the variable “APOBEC  
322 mutation load minimum estimate”, which represents APOBEC mutation pattern<sup>8</sup>. mRNA expression  
323 of *A3A* and *A3B* genes was analyzed in 11,058 TCGA samples (10,328 tumors and 730 adjacent  
324 normal tissues) based on RNA-seq BAM slices generated using workflow  
325 [https://docs.gdc.cancer.gov/API/Users\\_Guide/BAM\\_Slicing/](https://docs.gdc.cancer.gov/API/Users_Guide/BAM_Slicing/) through the NCI Genomics Data  
326 Commons (GDC) portal accessed in August 2019.

#### 327 *Estimation of A3A and A3B RNA-seq read counts for exons and exon-exon junctions*

328 For estimation of sequencing reads corresponding to all exons as well as canonical and alternatively  
329 spliced exon-exon junctions, RNA-seq Bam slices were processed through R package ASpli version  
330 1.5.1. We used strict ASpli pipeline settings, requiring a minimum of 10 nucleotides of perfect match  
331 covering exon-exon junctions.

#### 332 *Correlation analysis of mRNA expression and APOBEC mutagenesis*

333 Expression levels of the mutagenic isoforms *A3A1* and *A3B1* were calculated based on their RNA-seq  
334 exon-exon junction read counts. The counts of sequencing reads for E1-E2 junctions (for *A3A1*) and  
335 E5-E6 junctions (for *A3B1*) and APOBEC mutation load minimum estimate counts were Log10-  
336 transformed (after adding 1 to all raw values). The Spearman correlation analysis and data plotting  
337 were performed using R packages for six cancer types with  $\geq 10\%$  of samples with APOBEC



338 signature mutations. SKCM was excluded from the analysis because mutations induced by APOBEC  
339 in melanoma likely overlap with mutations induced by UV<sup>57</sup>.

#### 340 Analysis of AS levels in paired tumor and adjacent normal tissue samples

341 The analysis was performed in 17 cancer types with  $\geq 5$  tumor-normal pairs. Splicing ratios were  
342 calculated as PSI based on RNA-seq reads using ASpli pipeline, as was previously described<sup>28</sup> and  
343 statistical significance between PSI in tumors vs. normal tissues was evaluated by non-parametric  
344 Wilcoxon matched pairs signed rank test.

#### 345 **RNA-sequencing of SeV-infected T47D cells**

346 Total RNA extracted from the T47D breast cancer cells infected or not infected (control) with Sendai  
347 Virus (SeV)<sup>1</sup>, was used for paired-end RNA-seq on HiSeq 2500 (Illumina) in biological duplicates.  
348 The library was prepared with KAPA Stranded RNA-seq Kit with RiboErase (Roche). RNA-seq  
349 reads (120 bp) were filtered and aligned with STAR alignment tool<sup>58</sup> using the GRChg37/hg19  
350 genome assembly and visualized using the Integrative Genomics Viewer (IGV). The RNA-seq reads  
351 aligned to *A3A* were Bam-sliced with SAM tools and then re-aligned to the reference genome by  
352 STAR to identify cross-alignment with *A3B*.

#### 353 **Bioinformatics analysis of the A3A and A3B protein isoforms**

354 Protein sequences of the APOBEC3 isoforms A3A1 (UCSC ID uc003awn.2), A3A2 (UCSC ID  
355 uc011aob.1), A3B1 (UCSC ID uc003awo.1), A3B2 (UCSC ID uc003awp.1), and A3B3 (UCSC ID  
356 uc003awq.1) were downloaded from the UCSC genome browser. Multi-sequence alignments were  
357 generated using the web-based tool Clustal Omega<sup>59</sup>.

#### 358 **Cell lines**

359 Cell lines - embryonic kidney HEK293T, bladder cancer cell lines - HT-1376, RT-4, HTB-9, and  
360 SW780, breast cancer cell lines - MCF-7, MDA-MB-231 (HTB-26), and T47D (HTB-133),

361 hepatocellular carcinoma HepG2, and lung carcinoma H460 - were purchased from the American  
362 Type Culture Collection (ATCC) and maintained per ATCC recommendations. A pancreatic cancer  
363 cell line PA-TU-8998T was purchased from Leibniz Institute DSMZ-German Collection of  
364 Microorganisms and Cell Cultures (DSMZ Scientific). No commonly misidentified cell lines were  
365 used in this project. If used longer than for a year after initial purchase, cell lines were authenticated  
366 by the Cancer Genomics Research Laboratory of NCI by genotyping a panel of microsatellite  
367 markers (Identifiler kit, Thermo Fisher Scientific). All cell lines were tested bi-monthly for  
368 mycoplasma contamination using the MycoAlert Mycoplasma Detection kit (Lonza).

### 369 **Analysis in non-muscle invasive bladder tumors from the UROMOL study**

370 A set of low-stage (Ta and T1) bladder tumors representing non-muscle-invasive bladder cancer  
371 (NMIBC) has been described<sup>27</sup>. Mutations were scored based on RNA-seq data and used for  
372 deconvolution into mutational signatures S1-S6, with S3 corresponding to the APOBEC-signature  
373 mutations<sup>27</sup>. The FASTQ files for RNA-seq data were aligned with STAR and BAM-sliced to include  
374 *A3A* and *A3B* genes, followed by estimation of all exon and exon junction reads using ASpli R  
375 package, similar to the analysis in TCGA samples. We performed a Spearman correlation analysis of  
376 log<sub>10</sub>-transformed read counts for *A3A1* and *A3B1* with APOBEC-signature mutation score (S3).  
377 Progression-free survival analysis was performed based on the expression of *A3A1* and *A3B1*  
378 mutagenic isoforms with samples divided into three groups: “No” - samples with undetectable  
379 expression (0 value); the remaining samples were split into two groups based on the expression below  
380 and above the median as “Low” and “High” groups, respectively. The Cox-regression models were  
381 adjusted for sex, age, and tumor stage .

### 382 **Analysis of additional bladder tumor and adjacent normal tissue samples**

383 The panel of muscle-invasive bladder tumors (n = 42) and adjacent normal (n = 32) tissue samples  
384 has been described<sup>60</sup>. For each of these samples, cDNA was synthesized from 250 ng of total RNA  
385 per 20  $\mu$ l reactions using the RT<sup>2</sup> First-Strand cDNA kit and random hexamers (Qiagen). For  
386 detection of splicing events between *A3B* exons 4 and 6, we performed PCR with primers: F\_ex4: 5'-  
387 GCCTTGGTACAAATTCGATGA-3' and R\_ex6: 5'-TGTGTTCTCCTGAAGGAACG-3', with  
388 cDNA input corresponding to 30 ng of total RNA per 25  $\mu$ l reactions using AmpliTaq Gold™ 360  
389 Master Mix. PCR-amplified products were resolved on 2% agarose gel, and each distinct PCR  
390 product was cut, purified, and Sanger-sequenced. For quantification of *A3B1* and *A3B3* splicing  
391 products, cDNA input corresponding to 10 ng of total RNA per reaction was used, as previously  
392 described<sup>1</sup>, and subjected to qRT-PCR using isoform-specific TaqMan assays (**Note S4**). Expression  
393 of *A3B1* and *A3B3* was normalized by the expression of endogenous controls *GAPDH* (assay  
394 4326317E) and *PPIA* (assay 4326316E). Western blot analysis for A3B1 protein and GAPDH  
395 (loading control) was performed as described in **Note S2**.

### 396 **Generation and partial purification of the recombinant A3A and A3B protein isoforms**

397 Expression constructs for the C-terminally Myc-DDK tagged canonical isoforms *A3A1* (NM\_145699)  
398 and *A3B1* (NM\_004900) cloned in the pCMV6 vector were purchased from OriGene (Rockville,  
399 MD). Open reading frames for the C-terminally Myc-DDK tagged alternative isoforms *A3A2*, *A3B2*,  
400 and *A3B3* (**Table S1**) were synthesized (Thermo Fisher Scientific) and cloned into BamHI/XbaI  
401 restriction sites of the pcDNA3.1(+) vector. The HEK293T cells (4 x 10<sup>6</sup> cells/20 ml) were seeded in  
402 175cm<sup>2</sup> flasks (Corning) and transiently transfected with plasmids after 24 hrs at 75% confluency  
403 using Lipofectamine 3000 (Thermo Fisher Scientific). Cells were harvested 24 hrs post-transfection  
404 and proteins were purified with c-Myc tagged Protein Mild Purification Kit (MBL, Japan) and eluted  
405 with 20  $\mu$ l of 1 mg/ml Myc peptide provided with the kit. The concentration of the total eluted

406 protein, which included both purified protein and Myc peptide, was estimated using a BCA protein  
407 assay (Thermo Fisher Scientific). For evaluating protein purity and enrichment, ~25 ug of total  
408 protein was resolved on 4–12% Tris-glycine SDS polyacrylamide gel (Life Technologies) and used  
409 for Western blot analysis. Densitometry analysis of Western blots showed at least 10-fold enrichment  
410 of all eluted isoforms compared to whole-cell lysates (**Note S3**). All candidate antibodies were tested  
411 for the detection of A3A and A3B protein isoforms after overexpression of corresponding expression  
412 constructs in cell lines (**Note S2**). Detection was done using HyGLO chemiluminescent HRP  
413 antibody detection reagent (Denville Scientific Inc).

#### 414 **Cytosine deamination assays with recombinant proteins**

415 Deamination activity of the recombinant A3A and A3B protein isoforms was tested as previously  
416 described<sup>61</sup>. Specifically, reactions were carried out in 10 µl of deamination buffer containing 10 mM  
417 Tris/HCl, pH 7.5, 50 mM NaCl, 1 mM DTT, 0.25 µg - 1 µg of partially purified A3A and A3B  
418 proteins and 1-5 pM of single-stranded DNA substrate – the target probe 5'-5Alexa488N/(ATA)<sub>8</sub>TCC  
419 (ATA)<sub>7</sub>-3', or a positive control probe 5'-5Alexa488N/(ATA)<sub>8</sub>TUU (ATA)<sub>7</sub>-3' (Invitrogen).  
420 Reactions were incubated in a water bath at 37°C for 2 hrs, treated with the Uracil DNA Glycosylase  
421 (UDG) for 40 min at 37°C, and then with 0.6 N NaOH for 20 min at 37°C. Final products were  
422 mixed with 2x RNA loading dye (Thermo Fisher Scientific) and heated at 95°C for 2-3 min. Of the  
423 final 40 µl reaction volume, one set of 14 µl aliquots was resolved on 15% TBE-urea polyacrylamide  
424 gel (Life Technologies) at 150 V for 1 hrs and 20 min at room temperature in 1x TBE buffer. Gels  
425 were imaged with Gel Doc (Bio-Rad) using Alexa 488 fluorescence settings. Another set of 14 µl  
426 aliquots from the same reactions was used for the detection of APOBEC3 proteins by Western  
427 blotting. Concentrations of eluted proteins were estimated based on densitometry of Western blots.  
428 For competition assays, the amounts of mutagenic isoforms and total reaction volumes were kept

429 constant while the amounts of non-mutagenic isoforms were increased. Proteins extracted from the  
430 lysates of untransfected cells were used as a negative control to account for inhibition caused by non-  
431 specific endogenous proteins. In the 1:1 control competition reaction, the non-mutagenic isoform was  
432 replaced by an equal amount of the negative control protein.

433 Deamination activity of endogenous A3B1 in the presence of pladienolide B was evaluated using a  
434 previously described protocol<sup>14</sup> with some modifications. Briefly, HT-1376 cells, treated with  
435 bleomycin (25 µg/ml) alone, pladienolide B alone (1, 10, 20, 40, 100 nM) and with combined  
436 bleomycin and pladienolide B, were harvested after 48 hrs in HED buffer (25 mM HEPES, 5 mM  
437 EDTA, 10 % glycerol, 1 mM DTT and protease inhibitor). The protein concentrations were  
438 determined based on a densitometric assessment of GAPDH by Western blot from 7 ul of total lysate  
439 for each condition. Each 20 ul deamination reaction contained equal amounts of total protein in 15 ul  
440 (adjusted with H<sub>2</sub>O), 1 ul (10 pM) of single-stranded DNA substrate –probe 5'-  
441 5Alexa488N/(ATA)<sub>8</sub>TCC (ATA)<sub>7</sub>-3', 2 ul 10× UDG buffer (Thermo Scientific), 1 ul (1U/ul) UDG  
442 and 1 ul RNaseA (100 mg/ml, Qiagen) and reactions were incubated at 37°C for 3 hrs. Subsequently,  
443 100 mM NaOH was added to each reaction, and the samples were then incubated at 37°C for 30  
444 minutes to cleave the abasic sites. Final products were mixed with 2x RNA loading dye (Thermo  
445 Fisher Scientific) and heated at 95°C for 2-3 min, and reactions were resolved on a 15 % urea-TBE  
446 gel and imaged as described above.

#### 447 **HIV-1 infectivity inhibition assays**

448 The activity of the A3B protein isoforms was evaluated with single-cycle infection assays for HIV-1  
449 restriction as has been described for APOBEC3G (A3G)<sup>22-24</sup>. Briefly, a G/B-A3B1 plasmid was  
450 constructed starting from the previously engineered A3B plasmid<sup>22</sup> by replacing 63 aa at the N-  
451 terminus with a similar region of A3G. This replacement increases the packaging of A3B protein into

452 HIV-1 viral particles, which is necessary for the ability of A3B to inhibit HIV-1 infectivity<sup>22,24</sup>. This  
453 system is suitable for analysis of A3B activity, which, like A3G, has two cytidine deaminase  
454 domains, but is not appropriate for evaluating the activity of A3A as it contains only one cytidine  
455 deaminase domain and A3G/A3A swap would not be compatible. Fusion constructs G/B-A3B-V1,  
456 G/B-A3B-V2, G/B-A3B-V3, were generated to represent three A3B expression constructs, all with  
457 C-terminal hemagglutinin epitope tags (3X-HA). All plasmids were verified by Sanger sequencing.  
458 Because the A3B plasmids were from three sources, we found two protein-changing single point  
459 variations that might be functionally relevant (**Figure S3**). To generate the virus for infection,  
460 HEK293T cells ( $4 \times 10^5$  cells/ 6-well dish) were transfected using LT1 reagent (Mirus Bio) with  
461 HDV-EGFP (1 ug), pHCMV-G (0.25 ug), and variable concentrations of plasmids (0, 680 and 1200  
462 ng), individually or in combinations. The virus was harvested 48 hrs post-infection, filtered with  
463 0.45-um-pore filters, and stored at -80 °C. Capsid p24 measurements were determined using the HIV-  
464 1 p24 capsid (CA) ELISA Kit (XpressBio). Normalized p24 CA amounts were used to infect TZM-bl  
465 cells containing HIV-1 Tat-inducible luciferase reporter gene, in a 96-well plate (4000 cells/well).  
466 Luciferase activity was measured 48 hrs after infection, using a 96-well luminometer (LUMIstar  
467 Galaxy, BMG LABTECH). For some experiments, portions of the viral supernatant were spun  
468 through a 20% sucrose cushion (15,000 rpm, 2 h, 4°C, in a Sorvall WX80 + ultracentrifuge),  
469 concentrated 10-fold, and used in experiments to determine virion encapsidation of APOBEC3  
470 proteins by Western blotting analysis as previously described<sup>23</sup>.

#### 471 **Evaluation of A3B3 mRNA degradation by nonsense-mediated decay (NMD)**

472 The HT-1376 cells were treated with DMSO (vehicle) or with 2, 5, and 10  $\mu$ M of digoxin (Sigma), an  
473 NMD inhibitor<sup>21</sup> dissolved in DMSO. The cells were harvested after 16 and 24 hrs of treatment; total  
474 RNA was isolated with an RNeasy kit with on-column DNase I treatment (Qiagen), and RNA

475 quantity and quality were analyzed with NanoDrop 8000 (Thermo Scientific). After an additional  
476 DNA removal step, cDNA for each sample was prepared from equal amounts of total RNA, using the  
477 RT<sup>2</sup> First-Strand cDNA kit and random hexamers (Qiagen). Expression was measured in the same  
478 cDNA with TaqMan expression assays (all from Thermo Fisher) for endogenous controls *GAPDH*  
479 (assay 4326317E) and *PPIA* (assay 4326316E), and positive control *ATF4* (assay Hs00909569\_g1),  
480 which is induced by NMD inhibition<sup>62</sup>; custom assays were used for detection of *A3B1*, *A3B3*, and  
481 *A3B1/A3B2* combined (**Note S4**). Experiments were performed in biological triplicates per condition  
482 and expression was measured in four technical replicates on QuantStudio 7 (Life Technologies) using  
483 TaqMan Gene Expression buffer (Life Technologies). Water and genomic DNA were used as  
484 negative controls for all assays. Expression was measured as  $C_t$  values (PCR cycle at detection  
485 threshold) and calculated as fold change using  $2^{-(\Delta\Delta C_t)}$  method in relation to control (untreated)  
486 groups of samples.

#### 487 **Bioinformatics analysis of *A3B* splicing *cis*-elements and SF binding sites**

488 Exonic sequences and 100 bp of intronic sequences upstream of each exon were used for the  
489 prediction of exonic splicing enhancer (ESE)/ silencer (ESS) motifs and branch point sites (BPS)  
490 using the Human Splicing Finder (HSF, [www.umd.be/HSF3/](http://www.umd.be/HSF3/))<sup>63</sup>. Per HSF guidelines, BPS with scores  
491 above 67 were considered high-confidence; the strength of ESE and ESS was evaluated based on the  
492 relative ESE/ESS ratio. Splicing factor (SF) binding sites were predicted using SFmap<sup>64</sup> and  
493 SpliceAid2<sup>65</sup> (**Table S3**).

#### 494 **Exontrap analysis of alternatively spliced exons of *A3A* and *A3B* genes**

495 Exon 2 of *A3A* and exons 5 and 6 of *A3B* with either 20 or 80 bp of flanking intronic sequences were  
496 synthesized (Thermo Fisher Scientific) and cloned in sense orientation using XhoI and NotI  
497 restriction sites of Exontrap vector pET01 (MoBiTec) to generate mini-genes that were validated by

498 Sanger sequencing. The HEK293T cells were seeded in a 96-well plate at a cell density of  $1.5 \times 10^4$   
499 and transfected the next day with 100 ng of mini-genes using Lipofectamine 3000 transfection  
500 reagent (Invitrogen), in 4 biological replicates. Cells were harvested 48 hrs post-transfection, and  
501 total RNA was extracted with QIACube using RNeasy kit with on-column DNase I treatment  
502 (Qiagen). For each sample, 0.5–1  $\mu$ g of total RNA was converted into cDNA with SuperScript III  
503 reverse transcriptase (Invitrogen) and a vector-specific primer: 5'-AGGGGTGGACAGGGTAGTG-  
504 3'. Samples were diluted with water, and cDNA corresponding to 1.5 ng of RNA input was used for  
505 each qRT-PCR reaction. Splicing products of each mini-gene were amplified using a common primer  
506 pair F: 5'-CACCTTTGTGGTTCTCACTTGG-3' and R: 5'-AGCACTGATCCACGATGCC-3',  
507 corresponding to vector exons V1 and V2 (**Figure 4, Figure 5, Figure S6**). An assay with primers F:  
508 5'-CCGTGACCTTCAGACCTTGG-3' and R: 5'-AGAGAGCAGATGCTGGTGCA-3' targeting  
509 Exontrap vector exon V2 was used as a control. All PCR-amplified splicing products were resolved  
510 by agarose gel electrophoresis. Specific bands were cut out from the gel, purified and validated by  
511 Sanger sequencing. Co-transfection of E5 mini-gene with 10 SFs was performed in HEK293T cells  
512 for 48 hrs, followed by RNA extraction and analysis of splicing patterns. Similar analyses were  
513 performed for four select SFs (SRSF2, SRSF3, CELF1, and ELAVL2) in SW-780, HT-1376, and  
514 HTB-9 cells. The E5 construct was also transfected into a panel of 10 cell lines for 24 hrs, and  
515 splicing analysis was performed as described above.

### 516 **Modulation of A3B exon 5 splicing**

517 Cell lines (HT-1376, HTB-9 and HeLa) were grown in 12-well plates at a density of  $1.5 \times 10^5$   
518 cells/well and treated with DMSO or 1, 10, 20, 40, and 100 nM pladienolide B (Santa Cruz, sc-  
519 391691) reconstituted in DMSO, in biological triplicates per condition. Cells were harvested after 8,  
520 16, 24, and 36 hrs of treatment separately for RNA and protein analysis. cDNA was synthesized from



521 300 ng of RNA in a 20  $\mu$ l reaction using the RT<sup>2</sup> First-Strand cDNA kit and random hexamers  
522 (Qiagen). cDNA corresponding to 30 ng of total RNA per reaction was used for PCR performed with  
523 sets of primers to amplify different fragments of *A3B*: primer pair 1 – F\_ex1: 5’-  
524 GGACAGGGACAAGCGTATCT-3’, R\_ex6: 5’-GCTCCAGGAGATGAACCAAG-3’; primer pair 2  
525 – F\_ex5: 5’-CCAGCACATGGGCTTTCTAT-3’, R\_ex8: 5’-GAGATGGTGGTGAACGGTCT-3’  
526 and primer pair 3 – F\_ex4: 5’-GCCTTGGTACAAATTCGATGA-3’, R\_ex6: 5’-  
527 TGTGTTCTCCTGAAGGAACG-3’. PCR-amplified splicing products were resolved by agarose gel  
528 electrophoresis, and specific bands were cut out from the gel, purified, and validated by Sanger  
529 sequencing. Quantification of *A3B1* and *A3B3* splicing products was performed with qRT-PCR using  
530 isoform-specific TaqMan assays (**Note S4**) and cDNA corresponding to 10 ng of total RNA per  
531 reaction, as previously described<sup>1</sup>. Expression of *A3B1* and *A3B3* was normalized by the expression  
532 of endogenous controls *GAPDH* (assay 4326317E) and *PPIA* (assay 4326316E). Water and genomic  
533 DNA were used as negative controls for all assays. Expression was measured as  $C_t$  values (PCR cycle  
534 at detection threshold) and calculated as  $\Delta\Delta C_t$  in relation to control (DMSO) groups of samples. For  
535 protein analysis, whole-cell extracts were harvested in RIPA buffer with proteinase inhibitor (Fisher  
536 Scientific) and used for Western blotting as described in **Note S2**. Shown are representative results of  
537 one of three independent experiments.

### 538 **Cell-based cytosine deamination assay**

539 To determine base substitution rates, we used an ssDNA oligo (**Figure S9A**), modified based on a  
540 previously reported oligo<sup>66</sup>. HT-1376 cells were nucleofected with 100 pmol of oligo alone or  
541 together with *A3B1* plasmid (program CM-130) with SF Cell Line 4D X Kit L (V4XC-2024) on  
542 Lonza 4D-Nucleofector. Nucleofected cells were then plated in a six-well plate and after 8 hrs, cells  
543 transfected only with oligo were treated with DMSO or pladienolide B for 64 hours. Cells were then

544 lysed with QuickExtract DNA Extraction Solution (Lucigen) and PCR-amplified using primers:  
545 Forward, 5'- TGATGATGTGAGTGGTGGATGA-3'; Reverse, 5'-  
546 TCATCAACACCTACCACACAC-3'. PCR products were gel-purified with a DNA gel extraction kit  
547 (QIAquick Gel Extraction Kit, Qiagen) and used for library preparation with TruSeq/ChIP-Seq  
548 reagents (Illumina), to generate 75 bp paired-end sequencing reads. Samples were barcoded,  
549 multiplexed and subjected to deep sequencing on the Illumina MiSeq instrument. The FASTQ files  
550 were aligned with custom reference (sequence of ssDNA oligo) using the BWA-MEM algorithm and  
551 then indexed by SAMtools.

### 552 **siRNA knockdown of SF3B1**

553 The HT-1376 cells were transfected with scrambled siRNA (#1022076), SF3B1 siRNA-1  
554 (SI00715932), or siRNA-2 (SI04154647), all from Qiagen, using Lipofectamine RNAiMAX Reagent  
555 (ThermoFisher). Cells were harvested after 36 hrs for RNA and protein and analyzed for *A3B* exon 5  
556 skipping by PCR as described above. SF3B1 knockdown was confirmed by Western blot with an  
557 anti-SF3B1 antibody (Abcam, ab172634, 1:1000 dilution), and GAPDH control as described above.

### 558 **Computational analysis**

559 All data processing and analyses were performed using R package versions (3.2.4-3.4.0), SPSS  
560 version 25, and NIH High-Performance Computing Biowulf cluster.

### 561 **Data and reagents availability**

562 The authors declare that data supporting the findings of this study are available from TCGA or within  
563 the paper and its supplementary information files. Additional information, protocols, and reagents can  
564 be provided on request to the corresponding author (LPO).

### 565 **Data deposition**

566 The RNA-seq dataset for T47D cells infected with SeV and uninfected cells has been deposited to  
567 NCBI Short Read Archive (SRA), accession number PRJNA512015.

## 568 **URLs**

569 Firehose Broad GDAC: <https://gdac.broadinstitute.org/>; Firebrowse: <http://firebrowse.org/#>; The  
570 Cancer Genome Atlas (TCGA): <http://cancergenome.nih.gov>; cBioPortal:  
571 <http://www.cbioportal.org/index.do>; Broad Institute Cancer Cell Line Encyclopedia (CCLE)  
572 <https://portals.broadinstitute.org/ccle>; Protein Data Bank (PDB):  
573 <http://www.rcsb.org/pdb/home/home.do>;  
574 Clustal Omega: (<http://www.ebi.ac.uk/Tools/msa/clustalo/>); SpliceAid 2  
575 ([http://193.206.120.249/splicing\\_tissue.html](http://193.206.120.249/splicing_tissue.html)); SFmap (<http://sfmap.technion.ac.il/>)  
576 Human Splicing Finder (HSF), [www.umd.be/HSF3/](http://www.umd.be/HSF3/); The R project for statistical computing:  
577 <http://www.r-project.org/>; Integrative Genomics Viewer (IGV): <http://www.broadinstitute.org/igv>;  
578 ASpli R package: <https://bioconductor.org/packages/release/bioc/vignettes/ASpli/inst/doc/ASpli.pdf>

## 579 **Competing financial interests**

580 The authors declare no competing financial interests.

## 581 **Acknowledgments**

582 The results presented here are in part based upon data generated by the TCGA Research Network.  
583 The study was supported by the Intramural Research Program of the National Cancer Institute -  
584 Division of Cancer Epidemiology and Genetics (L.P.O), AIDS Targeted Antiviral Program, Center  
585 for Cancer Research (V.K.P), and the NCI Innovation Award (R. B.). We thank the Cancer Genomics  
586 Research Laboratory of NCI for RNA-sequencing, Nathan Cole for help with retrieval of sliced  
587 RNA-seq BAM files from the NCI Data Commons portal and Dr. Marc-Henri Stern, Institute Curie,  
588 Paris, for critical comments and suggestions.

589

590

591

## 592 Figure legends

**Figure 1. Quantification of A3A and A3B expression based on the total and exon-exon junction RNA-seq reads in 11,058 TCGA samples.** **A)** Nucleotide sequences of exon-exon junctions specific to A3A and A3B isoforms. “X” – mismatch between A3A and A3B sequences. **B)** Schematics of A3A exons and splicing junctions. The bar graphs show the numbers of samples (y-axis) in relation to RNA-seq read counts grouped in 5 sub-categories (x-axis) for the total A3A expression and exon-exon junction-based expression of A3A1 and A3A2 isoforms. Based on exon junction reads ( $\geq 1$  read/sample), A3A1 (E1-E2 junction) is not expressed in most TCGA samples and A3A2 is expressed only in 386 samples (3.49%). **C)** Schematics of A3B exons and splicing junctions and comparison of gene expression based on the total and exon-exon junction reads corresponding to A3B isoforms. A3B2 and A3B3 are expressed in 53.55% (5,922 of 11,058) and 51.84% (5,733 of 11,058) of TCGA samples, respectively. The TCGA RNA-seq set includes 10,328 tumors and 730 adjacent normal tissue samples.

**Figure 2. Alternative splicing in A3A and A3B results in catalytically inactive protein isoforms.**

Clustal Omega alignment of protein sequences for **A)** canonical A3A1 and alternative A3A2 and **B)** canonical A3B1 and alternative A3B2 and A3B3 isoforms. A3A2 lacks 18 N-terminal aa (R10 - G27), including functional residues H11 and H16<sup>19</sup>, and A3B2 lacks a fragment with functional residues E255 and H253<sup>20</sup>. Skipping of exon 5 generates an A3B3 transcript that encodes a truncated protein without the catalytic domain, in which a frameshift at position L191 results in the replacement of a 132 aa fragment in the C-terminus of A3B by 62 aa of an aberrant frame-shifted sequence. **C)** Due to a premature termination codon (PTC) in the penultimate exon 6, A3B3 might be targeted by nonsense-mediated decay (NMD). The effect of NMD was tested by analysis of expression of A3B isoforms with TaqMan expression assays indicated by arrows and *ATF4* (positive control) in HT-1376 cells treated with DMSO (vehicle) or digoxin, an NMD-inhibitor. **D)** Outline of the *in vitro* deamination assays testing conversion of ssDNA substrate (S) of 48 nucleotides (nt) into a product (P) of 25 nt by the recombinant C-terminally Myc-DDK tagged **E)** A3A and **F)** A3B protein isoforms. Negative control reactions (Neg ctrl) lack A3A and A3B proteins; positive control probe (Pos ctrl) is completely converted by the UDG enzyme. Western blot (WB) analysis with an anti-DDK antibody shows the amounts of A3A and A3B proteins in reactions. **G)** HIV-1 infectivity restriction assays show no significant inhibitory effects of A3B2 on the activity of the A3B1 protein isoform measured for A3G/A3B protein fusions (G/B, **Figure S3**). Shown one of three representative experiments with Western blot for corresponding recombinant proteins and normalized relative luciferase units (RLU, %) for each labeled condition.

**Figure 3: Analysis of *A3A1* and *A3B1* expression based on exon-exon junction RNA-seq reads in relation to APOBEC-mediated mutagenesis and progression-free survival in patients with non-muscle invasive bladder cancer (NMIBC).**

Correlation analysis between mRNA expression of *A3A1* (A) and *A3B1* (B) and APOBEC-mediated mutagenesis, measured as ‘APOBEC mutation load minimum estimate’ in six cancer types in TCGA; C) in non-muscle invasive bladder cancer (NMIBC) in the UROMOL study, APOBEC-signature mutation score was significantly correlated with *A3B1* but not with *A3A1* expression. D) Kaplan-Meier plots for progression-free survival (PFS) of NMIBC based on *A3A1* and *A3B1* isoform expression in the UROMOL study. *P*-values are for multivariable Cox-regression models adjusted for sex, age, and tumor stage. Grouping into “No”, “Low” and “High” groups was done based on *A3B1* RNA-seq read counts, separating samples with no expression (zero reads) and then below and above the median for the remaining samples.

**Figure 4. Analysis of *A3B* alternative splicing in paired tumor and adjacent normal samples.**

The ratios of splicing events generating the canonical mutagenic *A3B1* isoform - exon 5 inclusion and the use of canonical exon 6 acceptor site were calculated as percent spliced-in index (PSI) based on RNA-seq reads in TCGA. A) Left plot shows that PSI values for the usage of canonical exon 6 acceptor site are significantly higher in tumors compared to normal samples for KICH and LUSC. Right plot shows that PSI values for exon 5 inclusion are significantly higher in tumors compared to normal samples for BLCA, HNSC, LICH, LUAD and LUSC. Red bars represent mean expression levels, *P*-values are for the non-parametric Wilcoxon matched samples signed-rank test. B) RT-PCR analysis in 63 bladder tissue samples. Sanger sequencing of RT-PCR products generated with primers for *A3B* exons 4 and 6 shows the canonical (*A3B1*) and alternative (*A3B2* and *A3B3*) splicing events. A splicing event (labeled as “Novel”) that involves both exon 5 skipping and the use of a cryptic splice site in exon 6, was detected in three samples. An AS event (mainly *A3B3*) was observed in 19% of all samples (13 of 63 samples), including 13% of tumors (4 of 30) and 27% of adjacent normal tissues (9 of 33). C) Western blot analysis for the *A3B1* protein. D) qRT-PCR analysis for *A3B1* and *A3B3* isoforms. Mean mRNA expression levels of *A3B1* were significantly higher in tumors and of *A3B3* - in adjacent normal tissues. Red bars represent mean expression levels, *P*-values are for the Student’s *t*-test.

**Figure 5. The efficiency of exon 5 skipping depends on branch point sites in intron 4 of *A3B***

A) Exontrap mini-gene E5 as an experimental model for the analysis of AS of *A3B* exon 5 (top panel). An agarose gel showing variable ratios of RT-PCR for splicing products of the E5 mini-gene at baseline (No SF control) and after co-transfection with 10 candidate SFs in HEK293T cells; negative control - untransfected cells; M - 100-bp size marker; positive control – vector-specific amplicon of 84 bp. Bands from separate gels representing three biological replicates were quantified by densitometry, and the *A3B1/A3B3* splicing shifts were calculated in relation to No SF control (right panel). Overexpression of SRSF2 significantly shifted splicing towards increased *A3B3*

expression (about 10%), \* $P < 0.05$  to \*\*\* $P < 0.001$  – the significance of  $P$ -values. **B**) Splicing patterns of the E5 mini-gene analyzed by RT-PCR and agarose gel electrophoresis in 10 human cell lines. RT-4 cell line was excluded due to unspecific PCR products. Bands from separate gels representing three biological replicates were quantified by densitometry to assess the skipping of *A3B* exon 5 (right panel). **C**) Branch points site (BPS) prediction for all 7 introns of *A3B* (**Table S5**). Shown are the BPS with the highest predicted scores for each intron, with indicated positions upstream of the corresponding exons and the numbers of predicted BPS in a 100 bp window. The two predicted BPS within intron 4 have the lowest scores of all *A3B* introns. **D**) Exon splicing enhancer (ESE) and exon splicing silencer (ESS) prediction within *A3B* exons. Exon 5 has the strongest ESS motif of all *A3B* exons. **E**) Comparison of splicing patterns for *A3B* exons 5 and 6 using mini-genes with ( $E5^{BPS+}$  and  $E6^{BPS+}$ ) and without ( $E5^{BPS-}$  and  $E6^{BPS-}$ ) predicted BPS.

### **Figure 6. Modulation of *A3B* exon 5 skipping by an SF3B1 inhibitor pladienolide B**

**A**) Schematic representation of the *A3B* splicing module (exon 4 - exon 6) featuring interactions between *trans*-factors of the spliceosomal machinery with splicing *cis*-elements: splice sites (SS), branch point sites (BPS), polypyrimidine tract (Py), and exonic splicing enhancers/silencers (ESE)/(ESS); possible outcomes of *A3B* exon 5 splicing resulting from interactions between SF3B1 and other spliceosomal proteins with weak versus strong BPS. **B**) Schematic representation of the hypothesis depicting that inhibition of SF3B1 is expected to result in skipping of *A3B* exon 5 and downregulation of A3B1 protein. **C**) PCR analysis of splicing patterns of *A3B* exons 5 and 6 using Exontrap mini-genes  $E5^{BPS+}$  and  $E6^{BPS+}$  in HT-1376 cells treated for 36 hrs with increasing concentrations of pladienolide B. Exon 5 skipping is increased in the presence of the SF3B1 inhibitor, while splicing of exon 6 is not affected. **D**) Results of qRT-PCR in HT-1376 cells treated with increasing concentrations of pladienolide B for indicated time points show splicing shift from *A3B1* to *A3B3*. **E**) Results of RT-PCR expression analysis and Western blot protein analysis of HT-1376 cells treated with increasing concentrations of pladienolide B for 36 hrs show splicing shift from *A3B1* to *A3B3*, resulting in downregulation of A3B1 protein, while the aberrant and unstable A3B3 protein was not detected. Protein quantification is for three independent experiments. **F**) RT-PCR analysis of exon 5 splicing representing *A3B1* and *A3B3* transcripts in HT-1376 cells treated with DMSO (vehicle), digoxin (an NMD-inhibitor), pladienolide B alone, and pladienolide B with digoxin. *A3B3* mRNA levels are increased in digoxin-treated cells due to its inhibition of NMD. **G**) Deamination assays using whole-cell extracts from HT-1376 cells treated with bleomycin and pladienolide B. Equal amounts of total protein were used for each reaction based on densitometry pre-assessment of GAPDH protein levels in each sample (not shown). Deamination was observed in reactions with protein lysate of HT-1376 cells treated with bleomycin alone or bleomycin plus 1 nM of pladienolide B. Higher concentrations of pladienolide B (10, 20, 40 and 100 nM) significantly reduced A3B1 levels and prevented deamination of ssDNA probe in bleomycin-treated conditions. Western blot (WB) analysis with an anti-A3B1 antibody shows the amounts of A3B1 in corresponding reactions. A3B1 was barely detectable in DMSO and pladienolide B only conditions

because of very low total protein input in reactions (2 ul of total lysate). Shown are representative results of one of the three independent experiments.

**Figure 7. The proposed role of alternative splicing of *A3B* and its targeting for modulating APOBEC mutagenesis.**

Canonical splicing of *A3B* pre-mRNA generates the mutagenic A3B1 enzyme that causes APOBEC mutagenesis and fuels tumor progression, recurrence, clonal evolution, and chemotherapy resistance. Alternative splicing of *A3B*, and, specifically, skipping of exon 5, generates *A3B3* isoform with a premature termination codon (PTC) that is degraded by nonsense-mediated decay (NMD); the residual transcript encodes catalytically inactive protein isoform. Therapeutic enhancing of exon 5 skipping by SF3B1 inhibitors or other tools affecting alternative splicing such as splicing-switching oligonucleotides (SSOs), may restrict and even prevent A3B-mediated mutagenesis in clinically relevant conditions.

593  
594  
595  
596  
597  
598  
599  
600  
601  
602  
603  
604  
605  
606  
607  
608  
609  
610  
611  
612  
613  
614  
615  
616  
617  
618  
619  
620

**REFERENCES**

1. Middlebrooks, C.D. *et al.* Association of germline variants in the APOBEC3 region with cancer risk and enrichment with APOBEC-signature mutations in tumors. *Nat Genet* **48**, 1330-1338 (2016).
2. Faltas, B.M. *et al.* Clonal evolution of chemotherapy-resistant urothelial carcinoma. *Nat Genet* **48**, 1490-1499 (2016).
3. Law, E.K. *et al.* The DNA cytosine deaminase APOBEC3B promotes tamoxifen resistance in ER-positive breast cancer. *Sci Adv* **2**, e1601737 (2016).
4. Roper, N. *et al.* APOBEC Mutagenesis and Copy-Number Alterations Are Drivers of Proteogenomic Tumor Evolution and Heterogeneity in Metastatic Thoracic Tumors. *Cell Rep* **26**, 2651-2666 e6 (2019).
5. Shi, J. *et al.* Somatic Genomics and Clinical Features of Lung Adenocarcinoma: A Retrospective Study. *PLoS Med* **13**, e1002162 (2016).
6. Miao, D. *et al.* Genomic correlates of response to immune checkpoint blockade in microsatellite-stable solid tumors. *Nat Genet* **50**, 1271-1281 (2018).
7. Chan, K. *et al.* An APOBEC3A hypermutation signature is distinguishable from the signature of background mutagenesis by APOBEC3B in human cancers. *Nature Genetics* **47**, 1067-+ (2015).
8. Roberts, S.A. *et al.* An APOBEC cytidine deaminase mutagenesis pattern is widespread in human cancers. *Nat Genet* **45**, 970-6 (2013).
9. Burns, M.B. *et al.* APOBEC3B is an enzymatic source of mutation in breast cancer (vol 494, 366, 2013). *Nature* **502**, 580-580 (2013).
10. Starrett, G.J. *et al.* The DNA cytosine deaminase APOBEC3H haplotype I likely contributes to breast and lung cancer mutagenesis. *Nat Commun* **7**, 12918 (2016).
11. Nik-Zainal, S. *et al.* Association of a germline copy number polymorphism of APOBEC3A and APOBEC3B with burden of putative APOBEC-dependent mutations in breast cancer. *Nat Genet* **46**, 487-91 (2014).

- 621 12. Caval, V., Suspene, R., Shapira, M., Vartanian, J.P. & Wain-Hobson, S. A prevalent cancer susceptibility  
622 APOBEC3A hybrid allele bearing APOBEC3B 3'UTR enhances chromosomal DNA damage. *Nat*  
623 *Commun* **5**, 5129 (2014).
- 624 13. Henderson, S., Chakravarthy, A., Su, X., Boshoff, C. & Fenton, T.R. APOBEC-mediated cytosine  
625 deamination links PIK3CA helical domain mutations to human papillomavirus-driven tumor  
626 development. *Cell Rep* **7**, 1833-41 (2014).
- 627 14. Kanu, N. *et al.* DNA replication stress mediates APOBEC3 family mutagenesis in breast cancer.  
628 *Genome Biol* **17**, 185 (2016).
- 629 15. Mockenhaupt, S. & Makeyev, E.V. Non-coding functions of alternative pre-mRNA splicing in  
630 development. *Semin Cell Dev Biol* **47-48**, 32-9 (2015).
- 631 16. Harari, A., Ooms, M., Mulder, L.C. & Simon, V. Polymorphisms and splice variants influence the  
632 antiretroviral activity of human APOBEC3H. *J Virol* **83**, 295-303 (2009).
- 633 17. Ebrahimi, D. *et al.* Genetic and mechanistic basis for APOBEC3H alternative splicing, retrovirus  
634 restriction, and counteraction by HIV-1 protease. *Nat Commun* **9**, 4137 (2018).
- 635 18. Lassen, K.G., Wissing, S., Lobritz, M.A., Santiago, M. & Greene, W.C. Identification of two APOBEC3F  
636 splice variants displaying HIV-1 antiviral activity and contrasting sensitivity to Vif. *J Biol Chem* **285**,  
637 29326-35 (2010).
- 638 19. Bohn, M.F. *et al.* The ssDNA Mutator APOBEC3A Is Regulated by Cooperative Dimerization. *Structure*  
639 **23**, 903-911 (2015).
- 640 20. Shi, K., Carpenter, M.A., Kurahashi, K., Harris, R.S. & Aihara, H. Crystal Structure of the DNA  
641 Deaminase APOBEC3B Catalytic Domain. *J Biol Chem* **290**, 28120-30 (2015).
- 642 21. Nickless, A. *et al.* Intracellular calcium regulates nonsense-mediated mRNA decay. *Nat Med* **20**, 961-6  
643 (2014).
- 644 22. Pak, V., Heidecker, G., Pathak, V.K. & Derse, D. The role of amino-terminal sequences in cellular  
645 localization and antiviral activity of APOBEC3B. *J Virol* **85**, 8538-47 (2011).
- 646 23. Maiti, A. *et al.* Crystal structure of the catalytic domain of HIV-1 restriction factor APOBEC3G in  
647 complex with ssDNA. *Nat Commun* **9**, 2460 (2018).
- 648 24. Stenglein, M.D., Matsuo, H. & Harris, R.S. Two regions within the amino-terminal half of APOBEC3G  
649 cooperate to determine cytoplasmic localization. *J Virol* **82**, 9591-9 (2008).
- 650 25. Burns, M.B., Temiz, N.A. & Harris, R.S. Evidence for APOBEC3B mutagenesis in multiple human  
651 cancers. *Nat Genet* **45**, 977-83 (2013).
- 652 26. Petljak, M. *et al.* Characterizing Mutational Signatures in Human Cancer Cell Lines Reveals Episodic  
653 APOBEC Mutagenesis. *Cell* **176**, 1282-1294 e20 (2019).
- 654 27. Hedegaard, J. *et al.* Comprehensive Transcriptional Analysis of Early-Stage Urothelial Carcinoma.  
655 *Cancer Cell* **30**, 27-42 (2016).
- 656 28. Schafer, S. *et al.* Alternative Splicing Signatures in RNA-seq Data: Percent Spliced in (PSI). *Curr Protoc*  
657 *Hum Genet* **87**, 11 16 1-11 16 14 (2015).
- 658 29. Wang, D.W. *et al.* APOBEC3B interaction with PRC2 modulates microenvironment to promote HCC  
659 progression. *Gut* **68**, 1846-1857 (2019).
- 660 30. Udquim, K.I., Zettelmeier, C., Banday, A.R., Lin, S.H. & Prokunina-Olsson, L. APOBEC3B expression in  
661 breast cancer cell lines and tumors depends on the estrogen receptor status. *Carcinogenesis* (2020).
- 662 31. Lee, Y. & Rio, D.C. Mechanisms and Regulation of Alternative Pre-mRNA Splicing. *Annu Rev Biochem*  
663 **84**, 291-323 (2015).
- 664 32. Corvelo, A., Hallegger, M., Smith, C.W.J. & Eyras, E. Genome-Wide Association between Branch Point  
665 Properties and Alternative Splicing. *Plos Computational Biology* **6**(2010).
- 666 33. Thanaraj, T.A. & Clark, F. Human GC-AG alternative intron isoforms with weak donor sites show  
667 enhanced consensus at acceptor exon positions. *Nucleic Acids Research* **29**, 2581-2593 (2001).



- 668 34. Andreadis, A., Broderick, J.A. & Kosik, K.S. Relative exon affinities and suboptimal splice site signals  
669 lead to non-equivalence of two cassette exons. *Nucleic Acids Res* **23**, 3585-93 (1995).
- 670 35. Teng, T. *et al.* Splicing modulators act at the branch point adenosine binding pocket defined by the  
671 PHF5A-SF3b complex. *Nature Communications* **8**(2017).
- 672 36. Webb, T.R., Joyner, A.S. & Potter, P.M. The development and application of small molecule  
673 modulators of SF3b as therapeutic agents for cancer. *Drug Discovery Today* **18**, 43-49 (2013).
- 674 37. Havens, M.A. & Hastings, M.L. Splice-switching antisense oligonucleotides as therapeutic drugs.  
675 *Nucleic Acids Res* **44**, 6549-63 (2016).
- 676 38. Landry, S., Narvaiza, I., Linfesty, D.C. & Weitzman, M.D. APOBEC3A can activate the DNA damage  
677 response and cause cell-cycle arrest. *Embo Reports* **12**, 444-450 (2011).
- 678 39. Suspene, R. *et al.* Somatic hypermutation of human mitochondrial and nuclear DNA by APOBEC3  
679 cytidine deaminases, a pathway for DNA catabolism. *Proceedings of the National Academy of  
680 Sciences of the United States of America* **108**, 4858-4863 (2011).
- 681 40. Aynaud, M.M. *et al.* Human Tribbles 3 Protects Nuclear DNA from Cytidine Deamination by  
682 APOBEC3A. *Journal of Biological Chemistry* **287**, 39182-39192 (2012).
- 683 41. Shinohara, M. *et al.* APOBEC3B can impair genomic stability by inducing base substitutions in  
684 genomic DNA in human cells. *Scientific Reports* **2**(2012).
- 685 42. Burns, M.B. *et al.* APOBEC3B is an enzymatic source of mutation in breast cancer. *Nature* **494**, 366-  
686 370 (2013).
- 687 43. Cieply, B. & Carstens, R.P. Functional roles of alternative splicing factors in human disease. *Wiley  
688 Interdiscip Rev RNA* **6**, 311-26 (2015).
- 689 44. Anczukow, O. & Krainer, A.R. Splicing-factor alterations in cancers. *RNA* **22**, 1285-301 (2016).
- 690 45. Li, Y.S. *et al.* Revealing the Determinants of Widespread Alternative Splicing Perturbation in Cancer.  
691 *Cell Reports* **21**, 798-812 (2017).
- 692 46. Martinez-Montiel, N., Anaya-Ruiz, M., Perez-Santos, M. & Martinez-Contreras, R.D. Alternative  
693 Splicing in Breast Cancer and the Potential Development of Therapeutic Tools. *Genes* **8**(2017).
- 694 47. Naro, C., Bielli, P., Pagliarini, V. & Sette, C. The interplay between DNA damage response and RNA  
695 processing: the unexpected role of splicing factors as gatekeepers of genome stability. *Frontiers in  
696 Genetics* **6**(2015).
- 697 48. Dutertre, M., Sanchez, G., Barbier, J., Corcos, L. & Auboeuf, D. The emerging role of pre-messenger  
698 RNA splicing in stress responses: sending alternative messages and silent messengers. *RNA Biol* **8**,  
699 740-7 (2011).
- 700 49. Li, X.L. & Manley, J.L. Inactivation of the SR protein splicing factor ASF/SF2 results in genomic  
701 instability. *Cell* **122**, 365-378 (2005).
- 702 50. Li, X. & Manley, J.L. Inactivation of the SR protein splicing factor ASF/SF2 results in genomic  
703 instability. *Cell* **122**, 365-78 (2005).
- 704 51. Lee, S.C. & Abdel-Wahab, O. Therapeutic targeting of splicing in cancer. *Nat Med* **22**, 976-86 (2016).
- 705 52. Lee, S.C. *et al.* Modulation of splicing catalysis for therapeutic targeting of leukemia with mutations in  
706 genes encoding spliceosomal proteins. *Nat Med* **22**, 672-8 (2016).
- 707 53. Aird, D. *et al.* Sensitivity to splicing modulation of BCL2 family genes defines cancer therapeutic  
708 strategies for splicing modulators. *Nat Commun* **10**, 137 (2019).
- 709 54. Seiler, M. *et al.* H3B-8800, an orally available small-molecule splicing modulator, induces lethality in  
710 spliceosome-mutant cancers. *Nature Medicine* **24**, 497-+ (2018).
- 711 55. Seiler, M. *et al.* Somatic Mutational Landscape of Splicing Factor Genes and Their Functional  
712 Consequences across 33 Cancer Types. *Cell Rep* **23**, 282-296 e4 (2018).
- 713 56. Shi, M.J. *et al.* APOBEC-mediated Mutagenesis as a Likely Cause of FGFR3 S249C Mutation Over-  
714 representation in Bladder Cancer. *Eur Urol* (2019).

- 715 57. Roberts, S.A. & Gordenin, D.A. Hypermutation in human cancer genomes: footprints and  
716 mechanisms. *Nat Rev Cancer* **14**, 786-800 (2014).
- 717 58. Dobin, A. *et al.* STAR: ultrafast universal RNA-seq aligner. *Bioinformatics* **29**, 15-21 (2013).
- 718 59. Sievers, F. *et al.* Fast, scalable generation of high-quality protein multiple sequence alignments using  
719 Clustal Omega. *Molecular Systems Biology* **7**(2011).
- 720 60. Fu, Y.P. *et al.* Common genetic variants in the PSCA gene influence gene expression and bladder  
721 cancer risk. *Proc Natl Acad Sci U S A* **109**, 4974-9 (2012).
- 722 61. Nair, S. & Rein, A. In vitro Assay for Cytidine Deaminase Activity of APOBEC3 Protein. *Bio Protoc*  
723 **4**(2014).
- 724 62. Mendell, J.T., Sharifi, N.A., Meyers, J.L., Martinez-Murillo, F. & Dietz, H.C. Nonsense surveillance  
725 regulates expression of diverse classes of mammalian transcripts and mutes genomic noise. *Nat*  
726 *Genet* **36**, 1073-8 (2004).
- 727 63. Desmet, F.O. *et al.* Human Splicing Finder: an online bioinformatics tool to predict splicing signals.  
728 *Nucleic Acids Res* **37**, e67 (2009).
- 729 64. Paz, I., Akerman, M., Dror, I., Kosti, I. & Mandel-Gutfreund, Y. SFmap: a web server for motif analysis  
730 and prediction of splicing factor binding sites. *Nucleic Acids Res* **38**, W281-5 (2010).
- 731 65. Piva, F., Giulietti, M., Burini, A.B. & Principato, G. SpliceAid 2: a database of human splicing factors  
732 expression data and RNA target motifs. *Hum Mutat* **33**, 81-5 (2012).
- 733 66. Lei, L. *et al.* APOBEC3 induces mutations during repair of CRISPR-Cas9-generated DNA breaks. *Nat*  
734 *Struct Mol Biol* **25**, 45-52 (2018).

735

736

**A**

A3A1 E1-E2 junction AGCCAGCCCAGCATCCGGGCCAGACACTTGATGGATCCACACATATTC E1 E2

A3A2 E1-aE2 junction AGCCAGCCCAGCATCCGGGCCAGGCATAAGACCTACCTGTGCTACGAA E1 aE2

A3B1 E5-E6 junction GCACATGGGCTTTCTATGCAACGAGGCTAAGAATCTTCTCTGTGGCTTTT E5 E6  
 Overlap with A3A E2-E3 GCACAGGGGCTTTCTACACAACCAGGCTAAGAATCTTCTCTGTGGCTTTT X E2 XX X E3

A3B2 E5-aE6 junction GCACATGGGCTTTCTATGCAACGAGTTGGACCCGGCCAGATCTACAGGG E5 aE6

A3B3 E4-E6 junction ACCGCAGCTAAAGGAGATTCTCAGGCTAAGAATCTTCTCTGTGGCTTTT E4 E6

**B**

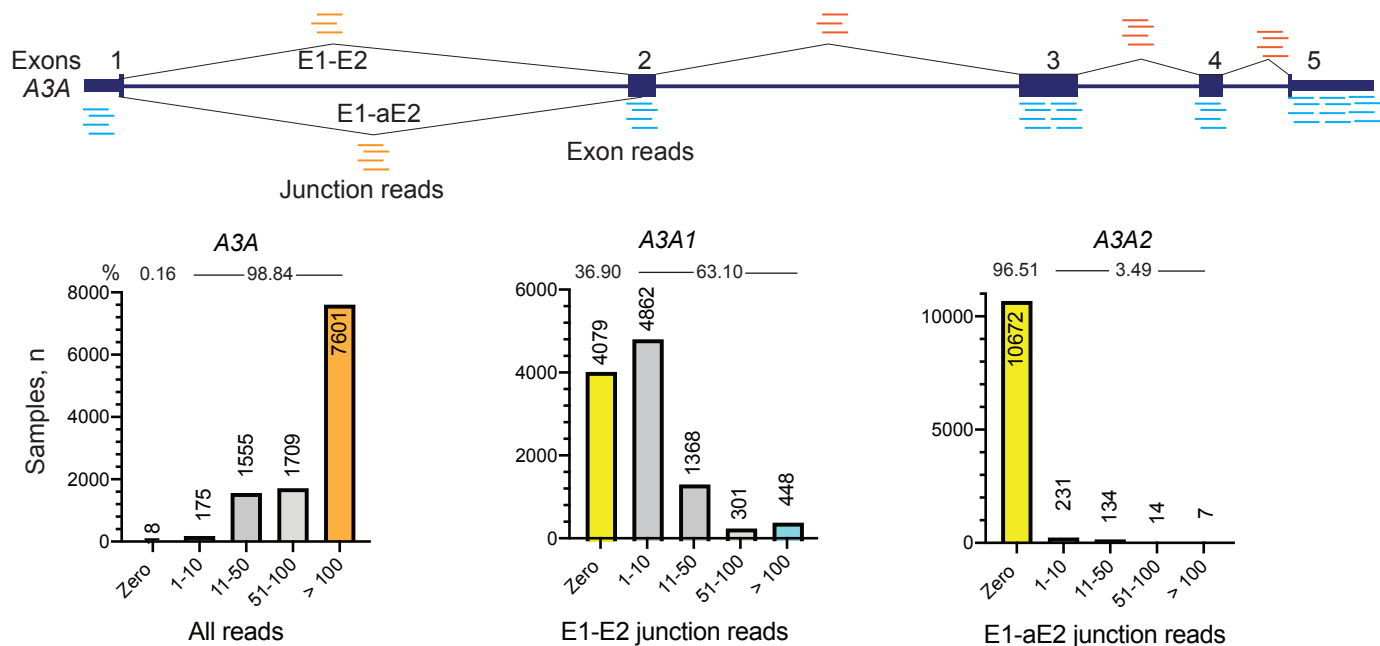

**C**

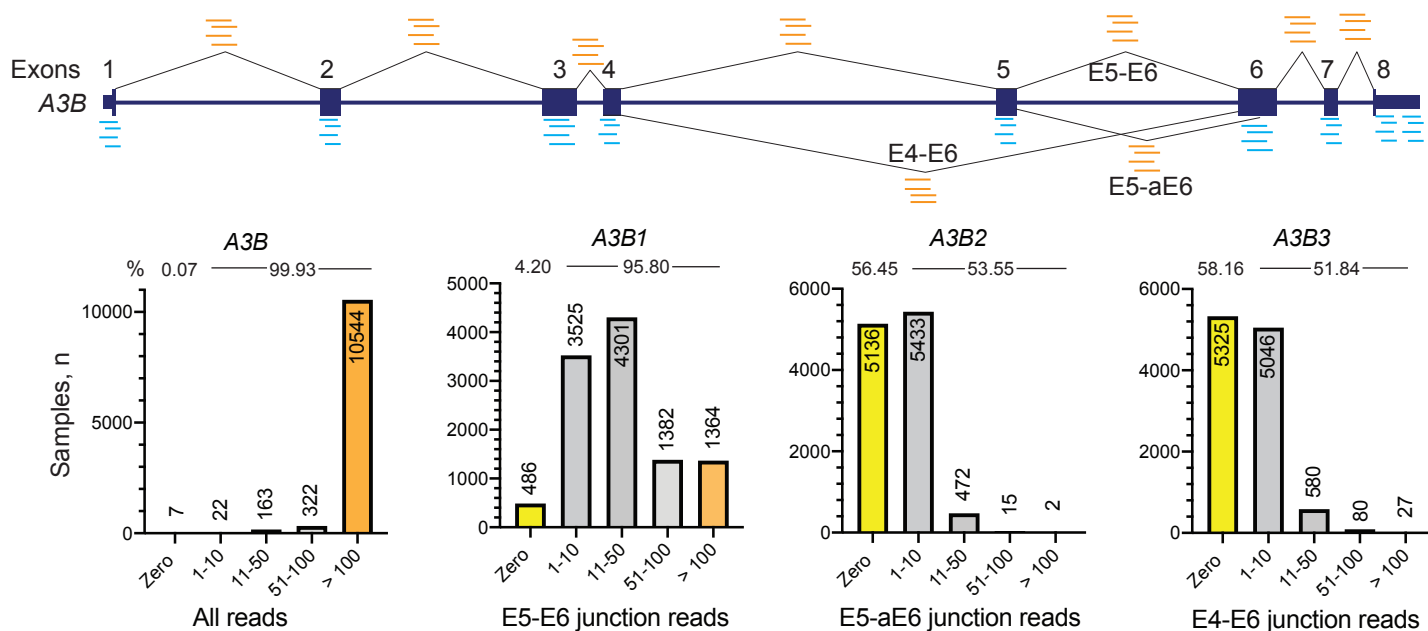

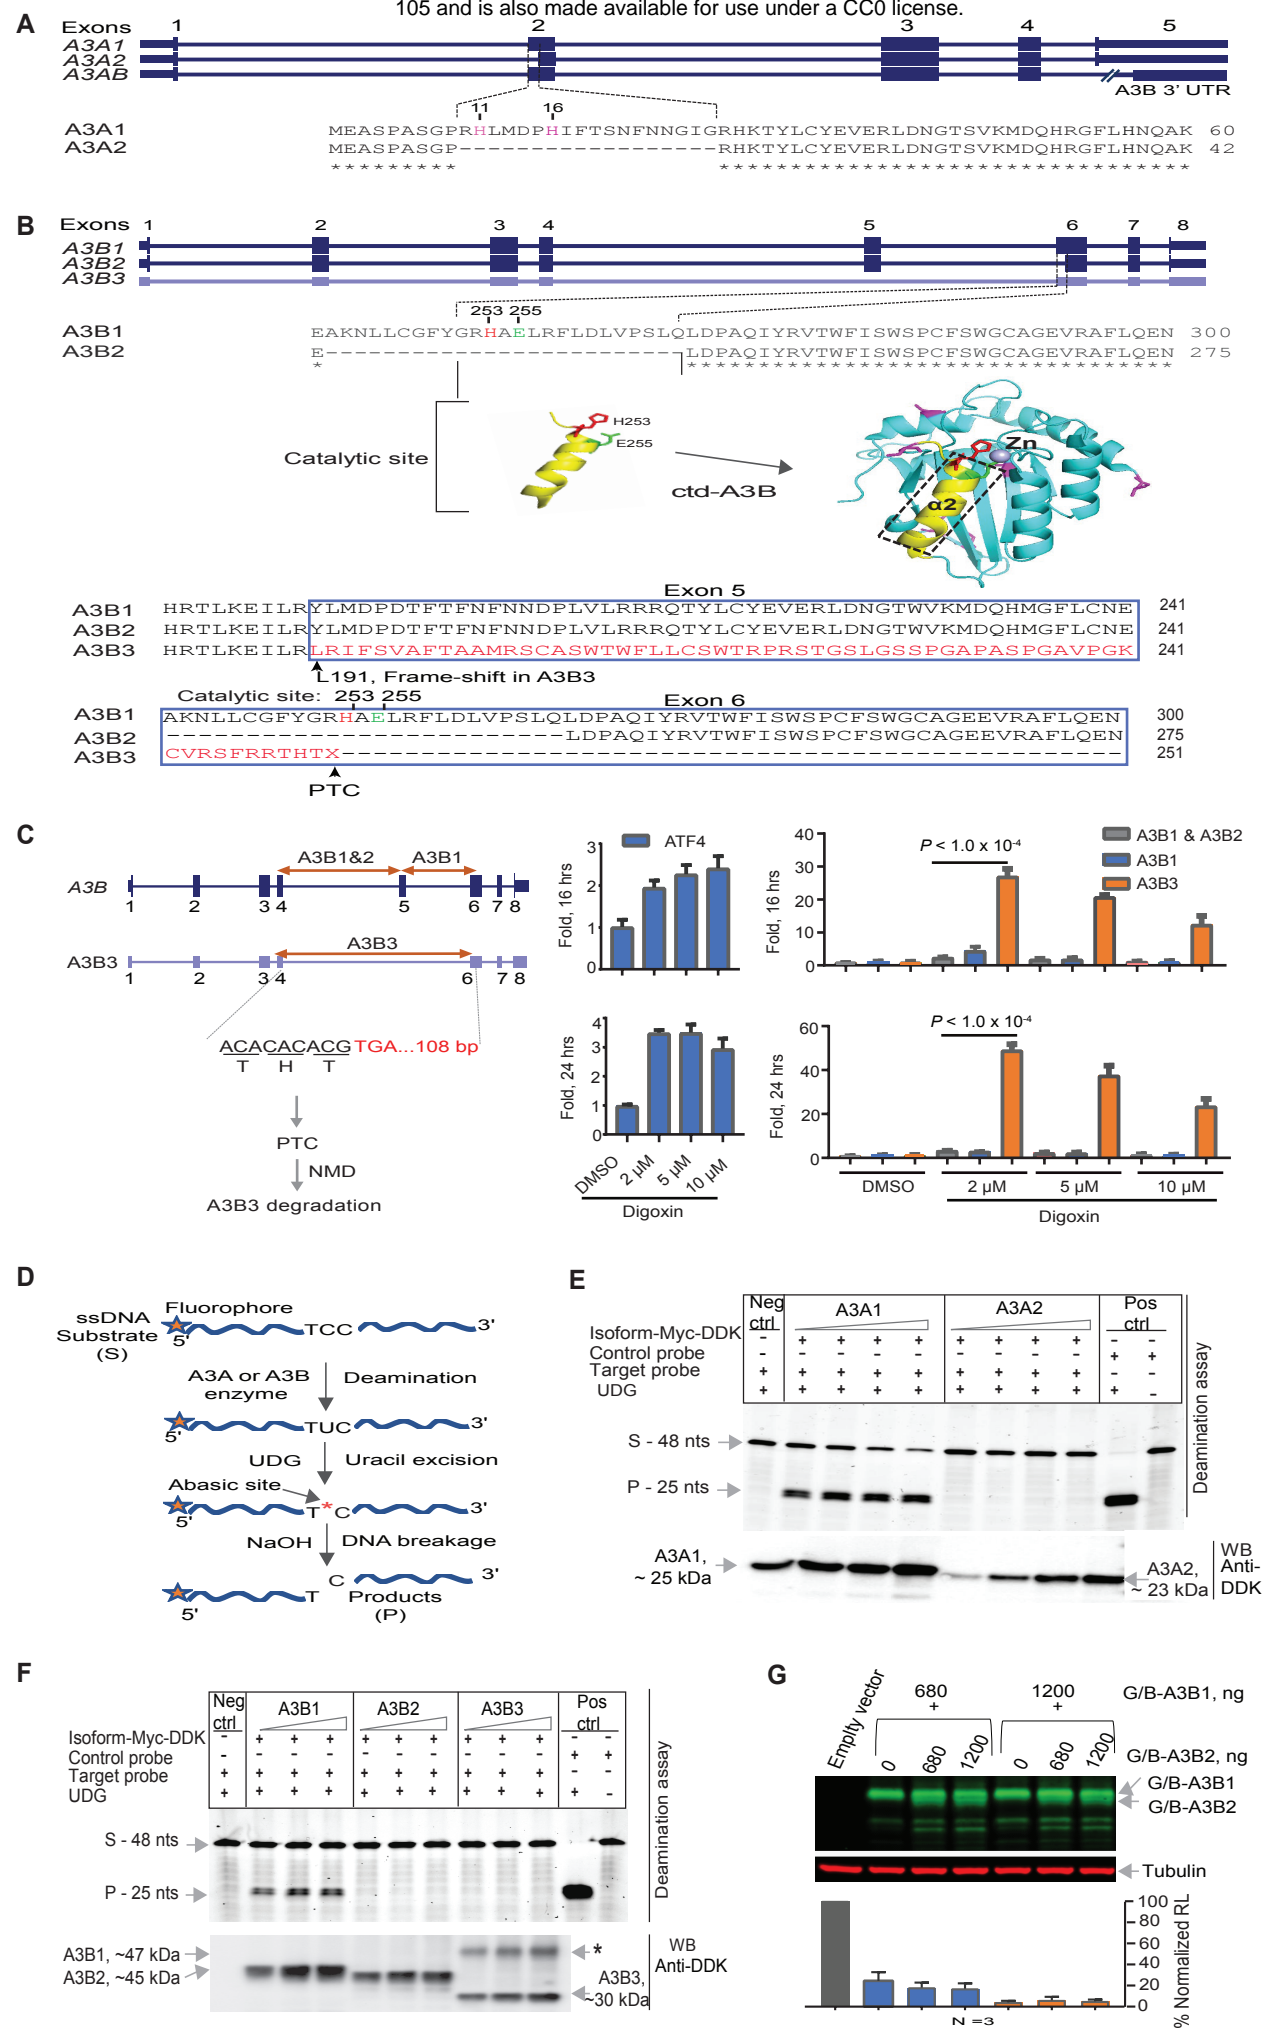

Fig. 3

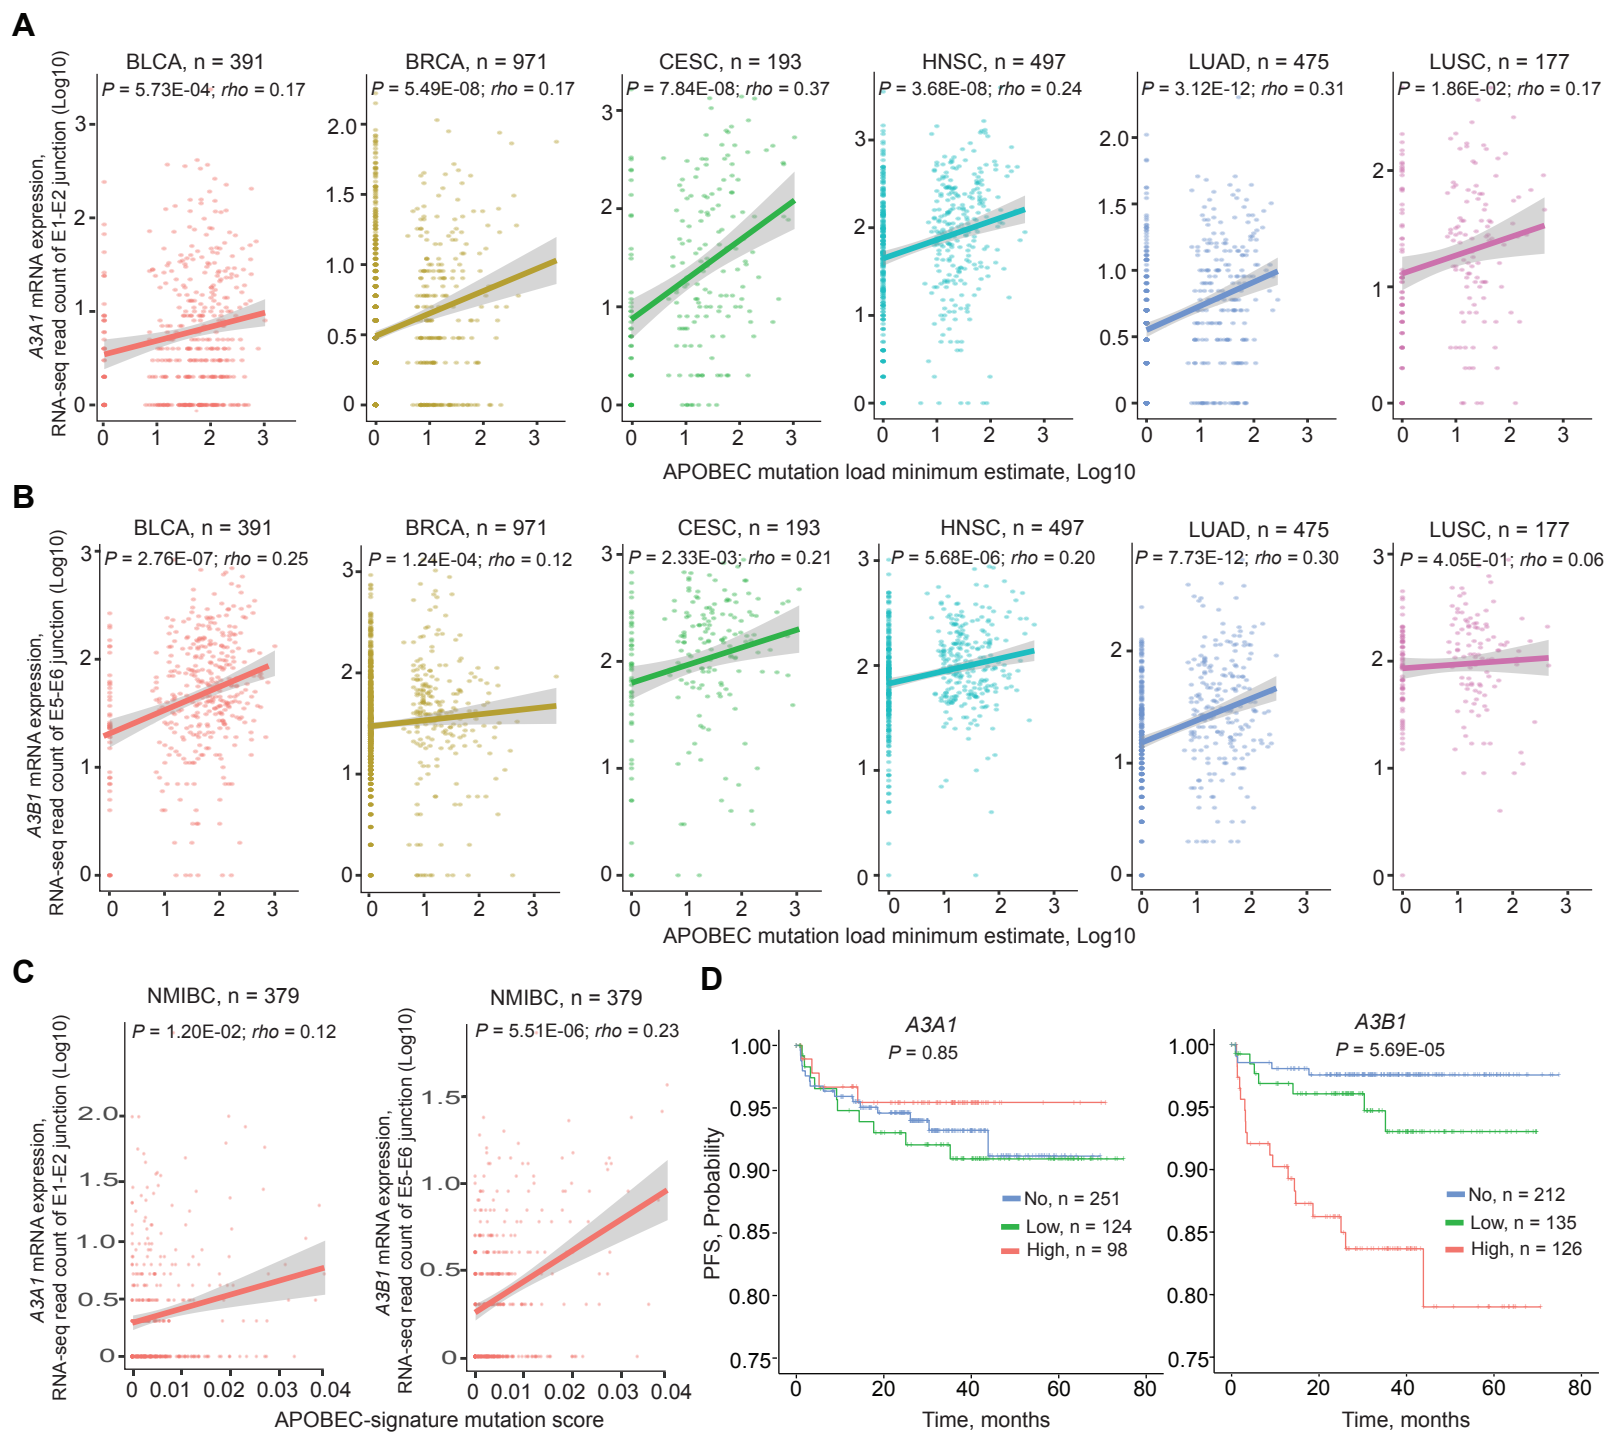



**A**

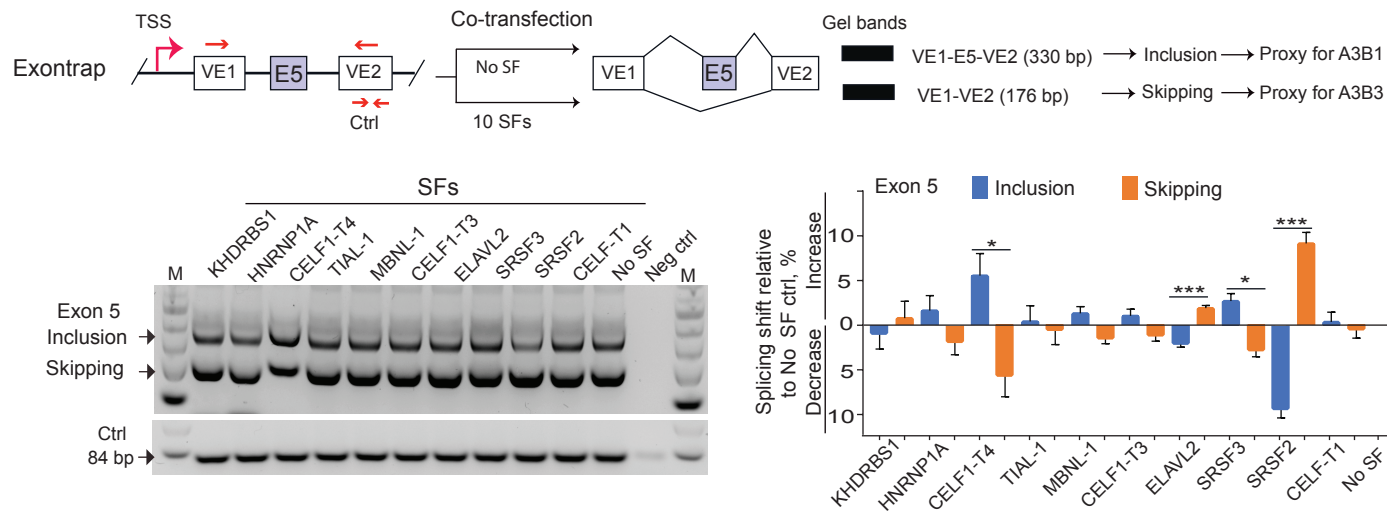

**B**

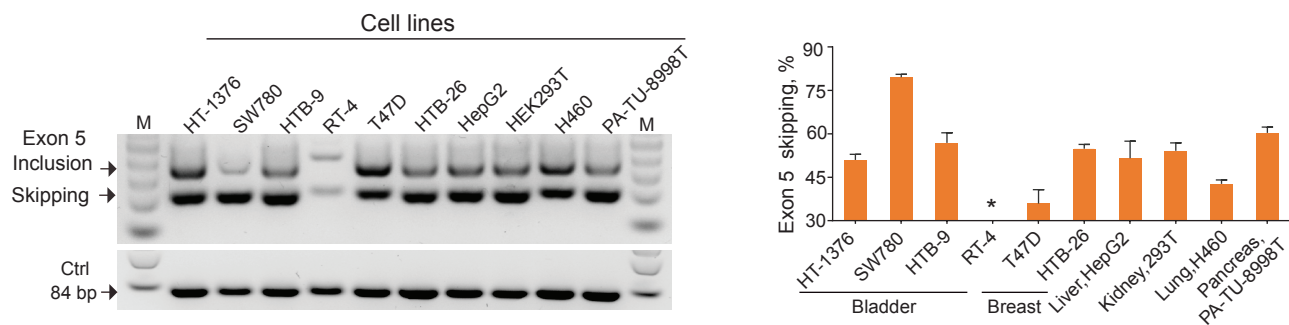

**C**

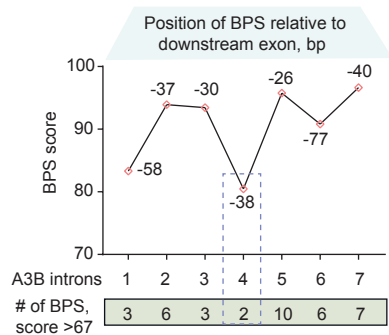

**D**

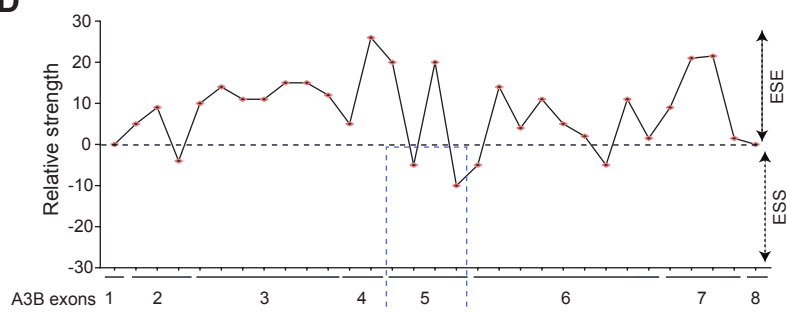

**E**

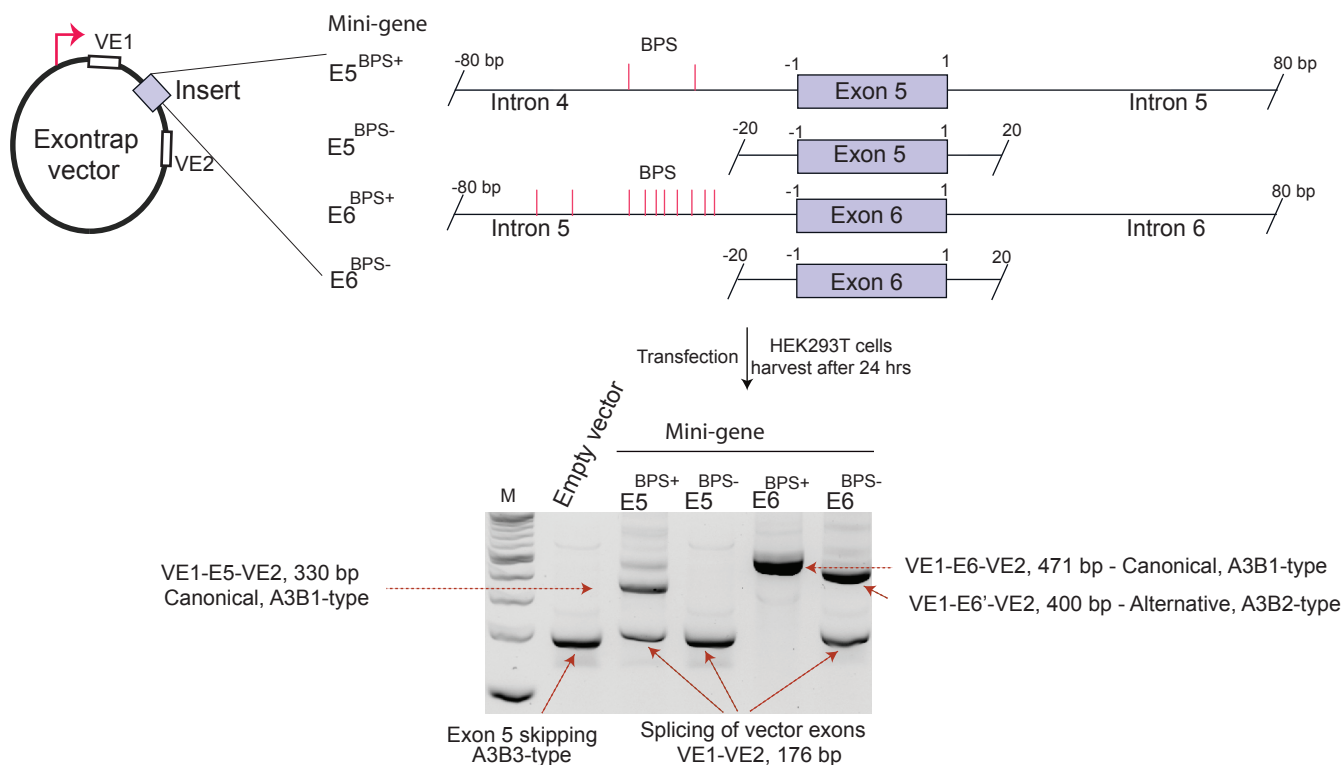





Fig. 7

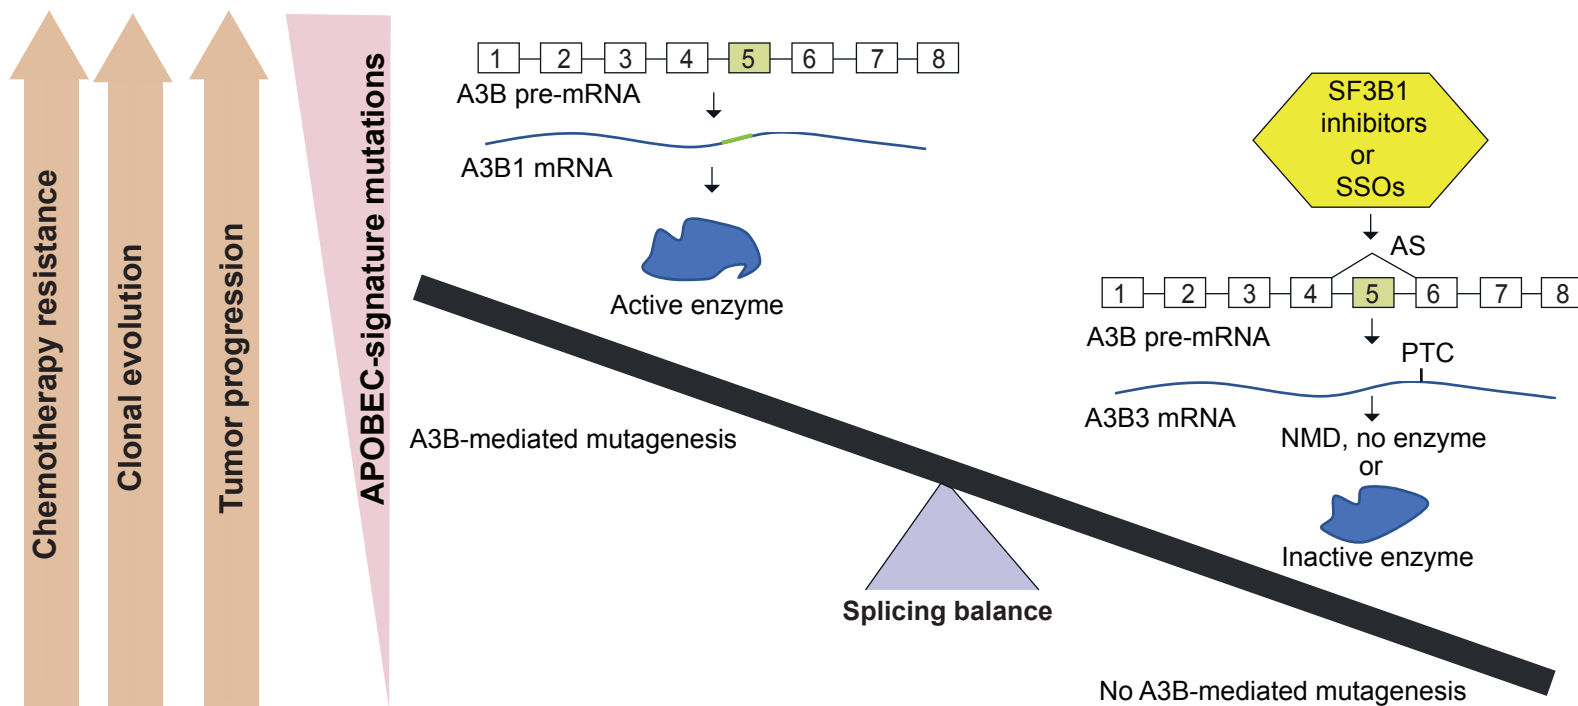

Source: http://biorxiv.org/content/10.1101/2020.09.27.315689v1.full.pdf
